# Supplementary material for: De Novo Modular Development of a Foldameric Protein–Protein Interaction Inhibitor for Separate Hot Spots: A Dynamic Covalent Assembly Approach
Source: PubMed Central journal article supplement — ChemistryOpen. 2017 Mar 13;6(2):236–41. doi: 10.1002/open.201700012 (PMC5390796; doi:10.1002/open.201700012), 2017-03-13
Supplement: OPEN-6-236-s001.pdf [file OPEN-6-236-s001.pdf]

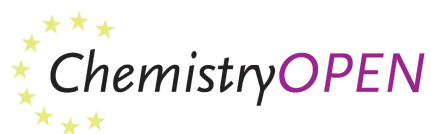

## Supporting Information

© 2017 The Authors. Published by Wiley-VCH Verlag GmbH & Co. KGaA, Weinheim

### **De Novo Modular Development of a Foldameric Protein–Protein Interaction Inhibitor for Separate Hot Spots: A Dynamic Covalent Assembly Approach**

Éva Bartus, Zsófia Hegedüs, Edit Wéber, Brigitta Csipak, Gerda Szakonyi, and Tamás A. Martinek<sup>\*[a]</sup>

open\_201700012\_sm\_miscellaneous\_information.pdf

## Table of contents

|                                                                                           |    |
|-------------------------------------------------------------------------------------------|----|
| Supplementary text .....                                                                  | 3  |
| Design and synthesis of the folded fragment library .....                                 | 3  |
| Mapping the hot spot regions of the model protein .....                                   | 3  |
| Supplementary materials and methods .....                                                 | 3  |
| Synthesis and purification of the folded fragment libraries .....                         | 3  |
| Synthesis purification of the pure foldamer sequences .....                               | 4  |
| Synthesis and purification of heterodimer 18 .....                                        | 4  |
| CaM expression, isotope labeling and purification .....                                   | 5  |
| Tryptophan fluorescence blue-shift measurements .....                                     | 5  |
| Native gel electrophoresis .....                                                          | 6  |
| CaM-Sepharose pulldown experiments .....                                                  | 6  |
| LC-MS methods and parameters .....                                                        | 7  |
| MS data analysis .....                                                                    | 7  |
| Solution NMR experiments for structural analysis of the peptides .....                    | 7  |
| NMR – <sup>15</sup> N HSQC titration experiments .....                                    | 8  |
| Supplementary Figures and Tables .....                                                    | 9  |
| Table S1. Characterization data of L1 .....                                               | 10 |
| Table S2. Characterization data of L2 .....                                               | 11 |
| Table S3. Characterization data of L3 .....                                               | 12 |
| Table S4. Characterization data of L4 .....                                               | 13 |
| Figure S1. Estimation of equimolarity and purity of the 64-membered sub-libraries .....   | 14 |
| Figure S2. Results of the pulldown assay. ....                                            | 15 |
| Figure S3. Chemical structure of the selected foldameric recognition segment candidates . | 16 |
| Figure S4. ITC titration data for 1-4. ....                                               | 16 |
| Figure S5. Fluorescence blue-shift measurements. ....                                     | 17 |
| Figure S6. Estimated $K_D$ values from Trp fluorescence measurements.....                 | 17 |

|                                                                                  |    |
|----------------------------------------------------------------------------------|----|
| Figure S7. ROESY spectra for 1-4 .....                                           | 18 |
| Figure S8. Structure and binding data for the non-helical control peptide .....  | 19 |
| Figure S9. trNOE spectra for 2 and 4 .....                                       | 20 |
| Figure S10. NMR CSP determination upon ligand binding .....                      | 21 |
| Table S5. Characterization data of the members of DCL .....                      | 22 |
| Figure S12. Synthesis of 18.....                                                 | 25 |
| Figure S13. Native gel electrophoresis .....                                     | 26 |
| Figure S14. Fluorescence titration experiment of 18.....                         | 26 |
| Figure S15. ITC competitive and control titrations for 18 measured at 35 °C..... | 27 |
| Figure S16. Competition pull-down assay .....                                    | 28 |
| Peptide characterization data .....                                              | 29 |
| Table S6. Summary of ESI-MS data.....                                            | 29 |
| References.....                                                                  | 57 |

## Supplementary text

### Design and synthesis of the folded fragment library

To achieve a quasi-equimolar library composition, double coupling of sub-stoichiometric amounts of the acylating amino acid mixtures (0.8 equivalent)<sup>1</sup> were used in positions 2 and 5, utilizing a long coupling time and microwave irradiation. The foldameric fragments were identified via HPLC-MS/MS measurements (Table S1-4), and the estimated library purities were in the range of ~69% to ~84% with acceptable equimolarity (Supplementary Fig. 1).

### Mapping the hot spot regions of the model protein

CaM was immobilized through a His-tag, which was incubated with the folded fragment libraries. After washing away the unbound fragments, the CaM-foldamer complexes were eluted and analysed using HPLC-MS. The integrated peaks were referenced to the control library and expressed in percentages, which provided an interaction map of CaM (Fig. 2b and Supplementary Fig. 2).

## Supplementary materials and methods

### Synthesis and purification of the folded fragment libraries

Foldamer libraries were synthesized using a CEM Liberty 1 microwave peptide synthesizer by the manual addition of amino acids. The four sub-libraries consisted of aromatic and  $\beta^3$ -*hMet* (**L1**); charged (**L2**); apolar (**L3**) and non-charged, polar (**L4**) amino acid side-chains.

Rink Amide PS resin was used for solid support and HATU (1-[bis(dimethylamino)methylene]-1H-1,2,3-triazolo[4,5-b]pyridinium 3-oxid hexafluorophosphate) was used as a coupling reagent. Fmoc-(1*S*,2*S*)-ACHC ((1*S*,2*S*)-Fmoc-2-aminocyclohexane carboxylic acid) was applied in excess of 3 equivalents at 75 °C for 30 min.  $\beta^3$ - amino acid mixtures were double coupled using 0.8 equivalents at 75 °C for 45 min. 16 different  $\beta^3$ -amino acids were coupled in position 5 and 4 different amino acids in the position 4, which yielded 64 different components in each sublibrary. The deprotection solution was 2 % piperidine 2 % DBU (1,8-diazabicycloundec-7-ene) in DMF (*N,N*-dimethylformamide), deprotection were carried out for 10 min at 75 °C. The foldamer mixture was cleaved by 90 % TFA (trifluoroacetic acid), 5 %

DTT (dithiothreitol), 5 % water, then the TFA was evaporated and the resin washed with acetic acid and water. The mixture was lyophilized. The library was purified by using RP-HPLC (Phenomenex Luna C18, 250x10 mm column). Fractions were analysed by MS and each fraction that contained library members was pooled together. Library components were identified by HPLC-MS based on molecular weight and retention time estimated by hydrophobic properties of the peptides. Purity analysis was based on quantification of the total library members and impurities by integration of the HPLC-MS chromatograms.

### **Synthesis purification of the pure foldamer sequences**

Foldameric sequences were synthesized manually using standard solid-phase peptide synthesis with Fmoc chemistry. Tentagel R RAM resin was used as solid support and HATU as coupling reagent. Amino acids and coupling reagents were used in excess of 3 equivalents and with shaking at room temperature for 3 h. Deprotection was carried out using a DMF solution containing 2 % DBU and 2 % piperidine. Cleavage was performed with TFA/H<sub>2</sub>O/DTT/TIS (triisopropylsilane) (90:5:2.5:2.5), which was followed by precipitation in ice-cold diethyl ether. The resin was washed with acetic acid and water, filtered, then lyophilized. Peptides were purified by RP-HPLC on a C18 column (Phenomenex Jupiter, 10x250 mm). The HPLC eluents were 0.1% TFA in water and 0.1% TFA, 80% ACN in water. Purity was confirmed by analytical RP-HPLC and ESI MS measurements.

### **Synthesis and purification of heterodimer 18**

Chloroacetylated **12** was synthesized on a solid support with C-terminal 4-methyltrityl (Mtt)-protected lysine. The Mtt protecting group was eliminated with a treatment of AcOH/TFE/DCM (2:1:7) for 1 h. Chloroacetic acid was coupled to the  $\epsilon$ -amino group of lysine in excess of 5 equivalents with DCC/HOAt activation. The crude peptide (**12-Lys(CIAc)**) was cleaved from the resin with a mixture of TFA/H<sub>2</sub>O/TIS (92:5:3) and followed by precipitation in ice-cold diethyl ether. The resin was washed with acetonitrile and water, then filtered and lyophilized. Crude peptide was purified by RP-HPLC on a C18 column (Phenomenex Luna, 250 x 10.00 mm). The purified **12-Lys(CIAc)** was completely dissolved in 0.1 M Tris buffer (pH = 8.2) with acetonitrile as a co-solvent. Previously purified **9-SH** was dissolved in the same buffer in 1.5 molar excess and added to the reaction mixture under continuous stirring (Supplementary Fig. 6.). After overnight incubation at room temperature, the mixture was

injected directly onto a C18 HPLC-column and purified. Purity was confirmed by analytical RP-HPLC and ESI-MS measurements.

### **CaM expression, isotope labeling and purification**

Calmodulin (CaM) (*bovine*) gene was cloned into pET28a vector. The sequenced plasmid was then transformed to competent *E. Coli* cells (BL21 DE3) for protein expression. Cells were grown on LB liquid media at 37 °C until OD600 = 0.5, then expression of CaM was induced by adding 200 µM IPTG and was carried out overnight (~19 hours) at 22 °C. After centrifugation, cell pellets were resuspended in Ni-NTA Lysis Buffer (50 mM NaH<sub>2</sub>PO<sub>4</sub>, 300 mM NaCl, 10 mM imidazole, pH 8.0) and were lysed by sonication with addition of 1 µM Leupeptin, 0.1 µg/ml Pepstatin A and 20 µM PMSF. The cleared lysate was first purified using a Ni-NTA filled column according to the manufacturer's protocol (Expression and purification of proteins using 6×Histidine-tag): After equilibration of the Ni-NTA column, lysate was added for a short incubation on ice (30 min), washed with Ni-NTA Wash Buffer (50 mM NaH<sub>2</sub>PO<sub>4</sub>, 300 mM NaCl, 20 mM imidazole, pH 8.0), and finally CaM was eluted with small volumes of Ni-NTA Elution buffer (50 mM NaH<sub>2</sub>PO<sub>4</sub>, 300 mM NaCl, 250 mM imidazole, pH 8.0). The clear fractions were concentrated using Amicon Ultra Filter Device (10K) and the buffer was changed to 20 mM HEPES, pH 7.0. The His-tag was removed with an overnight Thrombin digestion at 4 °C leaving 9 extra amino acid (GSHMARSNS) on the N terminus of the protein. Thus, the molecular weight of the protein was 17765.58 g/mol, which was confirmed by ESI-MS measurements.

In order to remove additional cleavage fragments after thrombin treatment CaM was purified by using RP-HPLC on a C4 (Phenomenex, Jupiter 250x10 mm) column, using a gradient of 40-70% B over 60 minutes at 4 ml min<sup>-1</sup> flow rate with A: 0.1% TFA/ H<sub>2</sub>O and B: 0.1% TFA in 20% H<sub>2</sub>O, 80% ACN. After lyophilization, the protein was subjected to dialysis in 20 mM, pH 7.0 HEPES buffer in order to remove TFA traces and ensure correct folding. Purity and folding was assessed by HPLC-MS, native ESI-MS and NMR measurements. CaM concentration was measured by using BCA assay (Thermo Scientific, Pierce) utilizing the manufacturer's protocol.

**Tryptophan fluorescence blue-shift measurements.** Fluorescence experiments were carried out using a Hitachi F-2500 fluorescence spectrophotometer (PMT voltage: 700 V, response: 0.08 s) at room temperature, in 20 mM HEPES, pH= 7.4 and 150 mM NaCl, containing 1 mM

CaCl<sub>2</sub> or 5 mM EDTA. Tryptophan excitation was performed at 295 nm to minimize contributions of CaM tyrosines to the emission spectra. Emission spectra were recorded from 305 to 400 nm and the excitation and emission bandwidths were set at 5 nm. For determination of  $K_D$ , 1 ml of 0.2  $\mu$ M foldamer solutions were titrated with CaM from stocks 2-100  $\mu$ M, so that the final added volume was < 2% of the total volume. The fluorescence intensity at 330 nm was monitored, and the results from three replicates were analyzed using one site-specific binding nonlinear regression analysis (GraphPad Prism 5.03). Nonspecific binding between the foldamers and CaM was measured in the presence of EDTA, and this titration was subtracted from total binding from the same titrations in CaCl<sub>2</sub>.

### **Native gel electrophoresis**

Native gel electrophoresis was run under non-denaturing condition that is suitable for the detection of protein-protein interactions or complex formation. The gel was prepared from 1.2 ml 30 % acryl-amide (Serva), 3 ml 2 × Gel buffer (480 mM glycine, 50 mM Tris), 1.8 ml distilled water, 60  $\mu$ l 10 % APS (ammonium peroxydisulfate) and 2.5  $\mu$ l TEMED (*N,N,N',N'*-Tetramethylethane-1,2-diamine). After polymerization, the gel was pre-run for 30 minutes, using 200 V voltage at 4 °C (Running buffer: 240 mM glycine, 25 mM Tris). CaM Samples were prepared in pH 7.0 20 mM HEPES buffer containing 30 mM CaCl<sub>2</sub> using 100  $\mu$ M protein concentration. The foldamer was added in different equivalents from a 1 mM stock solution prepared in DMSO. 10  $\mu$ l of the samples were mixed with 2  $\mu$ l 50 % glycerol, loaded into the pockets and followed by 30 minutes long run with the same settings as the pre-run. The gel was then treated with Coomassie Brilliant Blue G250 dye for 30 minutes and destained with a methanol and acetic-acid containing solution.

### **CaM-Sepharose pulldown experiments**

A pulldown experiment was performed by using CaM-Sepharose 4B resin. 700  $\mu$ l (1 mg/ml) resin washed 3 times with buffer A (20 mM HEPES, pH=7.4, with 150 mM NaCl and 2 mM CaCl<sub>2</sub>) and saturated with TRPV1-CT<sub>15</sub> at 200  $\mu$ M concentration for 30 min at room temperature. After the incubation, unbound peptide was completely washed with buffer A and separated into 7 equivalent volume portions (7 x 100  $\mu$ l) Each portion was incubated with different concentrations of **18** (0-100  $\mu$ M) for 30 min at room temperature and the eluted mixtures were collected and measured with HPLC-MS. Resin portions were washed several times with buffer A to remove unbounded peptides. The final elution was carried out by buffer B (20 mM HEPES pH=7.4, 150 mM NaCl and 2 mM EDTA). Samples were measured with

HPLC-MS, using 5-80 % during 15 min gradient elution (flow rate: 0.7 ml/min; selective ion monitoring mode  $m/z=706-708$  and  $m/z=899-901$ ).

### **LC-MS methods and parameters**

HPLC/ESI-MS analysis was used to characterize the samples from the pull-down assay and the composition of DCL. LC-MS analysis was performed with a Thermo Scientific Dionex UltiMate 3000 HPLC system interfaced to an LTQ ion trap mass spectrometer (Thermo Electron Corp., San Jose, CA, USA). Samples were injected onto an Aeris Widepore XB-C18 (250 x 4.6 mm) analytical HPLC column using gradient elution 5-80 % solution B during 25 minutes. For pull-down samples, eluent composition was 0.1 % acetic acid in distilled water (Solution A) and 0.1 % acetic acid in acetonitrile (solution B) and DCL samples were measured at 50 °C column temperature with 0.1 % formic acid in distilled water used for solution A and 0.1 % formic acid in acetonitrile for solution B. Mass spectra were acquired in full scan mode from 200 to 2000  $m/z$  range. For overlapping peaks, selective reaction monitoring (SRM) was used.

### **MS data analysis**

Thermo Xcalibur 2.2 software was used for peak identification and integration. The 83 % of the foldameric fragments could be resolved independently, *via* HPLC-MS/MS measurements based on molecular weight, MS fragmentation pattern and retention time considering the relative hydrophobicity of the side-chains. (Table S1-4). The majority of the unresolved peaks were foldamers that contained  $\beta^3$ -*h*Ile or  $\beta^3$ -*h*Leu in position 5. These were integrated and averaged. A representative raw file for each sub-library was utilized to create a processing method where each sample component was associated to a chromatographic peak based on the previously identified mass ( $m/z$ ) and retention time (Supporting Table S1-S4). Using ICIS peak detection algorithm the general detection and integration criteria were smoothing points: 5, baseline window: 80, area noise factor: 5, peak noise factor: 10. Using these processing setups, all raw data files were reprocessed together and analyzed. Errors in peak identification during the automatic processing were corrected manually.

### **Solution NMR experiments for structural analysis of the peptides**



Peptides were dissolved in 20 mM pH 7.0 d<sub>18</sub>-HEPES (90% H<sub>2</sub>O, 10% D<sub>2</sub>O) containing 0.02 % NaN<sub>3</sub> and 30 mM CaCl<sub>2</sub> at a concentration of 90-500 μM, depending on the solubility of the compound. NMR experiments were performed at 298 K. All spectra were acquired with the excitation sculpting solvent suppression pulse scheme with 2048 time domain points and 256 increments. 2D TOCSY measurements were performed with homonuclear Hartman–Hahn transfer with a mixing time of 80 ms (DIPSII sequence). 2D ROESY spectra were recorded with a mixing time of 400 ms. The number of scans varied between 8 and 64, depending on the concentration of the sample. In order to assess the bound conformation of the ligands, 0.02 equivalent CaM was added to the samples and 2D NOESY spectra were recorded with a mixing time of 150 ms. Control NOESY spectra were recorded in the absence of the protein.

### **NMR – <sup>15</sup>N HSQC titration experiments**

<sup>15</sup>N-HSQC titration NMR experiments were carried out on a Bruker Avance III 600 MHz spectrometer equipped with a 5 mm CP-TCI triple-resonance cryoprobe. <sup>15</sup>N/<sup>13</sup>C CaM (purchased from Creative Biolabs) was dissolved in 20 mM pH 7.0 d<sub>18</sub>-HEPES buffer (90 % H<sub>2</sub>O, 10 % D<sub>2</sub>O) containing 30 mM CaCl<sub>2</sub> and 0.02 % NaN<sub>3</sub>. Reference 2D heteronuclear <sup>15</sup>N-HSQC spectrum was acquired for the ligand-free CaM at a concentration of 45 μM at 30 °C with 256 increments and 16 scans. Foldamers **2** and **3** were added to the <sup>15</sup>N/<sup>13</sup>C CaM sample in solid form (aliquoted and lyophilized from solutions) and <sup>15</sup>N-HSQC spectra were measured again in the presence of **2** or **3**, resulting in a series of CaM spectra with 0.5, 1.0, 1.5, 2.0, 3.0 and 4.0 equivalent peptides. Chemical shift assignment was based upon literature data and verified by standard triple-resonance NMR experiments. Processing was carried out by using Topspin 3.5 (Bruker) and processed data were analysed with Sparky 3.114 (T. D. Goddard and D. G. Kneller, SPARKY 3, University of California, San Francisco). The chemical shift perturbation (CSP) values were calculated by using the formula  $[(\Delta\delta(^1\text{H}))^2 + 0.14*(\Delta\delta(^{15}\text{N}))^2]^{1/2}$ .

## Supplementary Figures and Tables

**Table S1. Characterization data of L1**

| $\beta^3$ -amino acid |     | Detected peaks |               |          | $MS^2$ fragment ions |        |        | Pull down assay |                            |
|-----------------------|-----|----------------|---------------|----------|----------------------|--------|--------|-----------------|----------------------------|
| 2nd                   | 5th | $[M+H]^+$      | $[M+2H]^{2+}$ | Rt (min) | b4                   | y4     | y3     | Detected ion    | Remark                     |
| F                     | A   | 764.67         | 382.75        | 14.50    | 537.32               | 478.34 | 353.26 | $[M+H]^+$       |                            |
| F                     | D   | 808.56         | 404.75        | 13.07    | 537.32               | 522.33 | 397.25 | $[M+H]^+$       |                            |
| F                     | E   | 822.58         | 411.75        | 13.10    | 537.32               | 536.34 | 411.26 | $[M+H]^+$       |                            |
| F                     | F   | 840.58         | 420.76        | 16.52    | 537.32               | 554.36 | 429.28 | $[M+H]^+$       |                            |
| F                     | I   | 806.67         | 403.77        | 16.79    | 537.32               | 520.38 | 395.30 | $[M+H]^+$       | average integral of FI, FL |
| F                     | K   | 821.58         | 411.28        | 10.07    | 537.32               | 535.39 | 410.31 | $[M+2H]^{2+}$   |                            |
| F                     | L   | 806.67         | 403.77        | 16.79    | 537.32               | 520.38 | 395.30 | $[M+H]^+$       | average integral of FI, FL |
| F                     | M   | 824.67         | 412.75        | 15.27    | 537.32               | 538.34 | 413.26 | $[M+H]^+$       |                            |
| F                     | N   | 807.58         | 404.25        | 12.22    | 537.32               | 521.34 | 396.26 | $[M+H]^+$       |                            |
| F                     | Q   | 821.58         | 411.26        | 12.36    | 537.32               | 535.35 | 410.27 | $[M+H]^+$       |                            |
| F                     | R   | 849.67         | 425.28        | 10.12    | 537.32               | 563.40 | 438.32 | $[M+2H]^{2+}$   |                            |
| F                     | S   | 780.58         | 390.75        | 12.64    | 537.32               | 494.33 | 369.25 | $[M+H]^+$       |                            |
| F                     | T   | 794.67         | 397.75        | 13.26    | 537.32               | 508.34 | 383.26 | $[M+H]^+$       |                            |
| F                     | V   | 792.67         | 396.76        | 16.11    | 537.32               | 506.36 | 381.28 | $[M+H]^+$       |                            |
| F                     | W   | 879.67         | 440.27        | 16.36    | 537.32               | 593.37 | 468.29 | $[M+H]^+$       |                            |
| F                     | Y   | 856.67         | 428.76        | 14.57    | 537.32               | 570.36 | 445.28 | $[M+H]^+$       |                            |
| M                     | A   | 748.67         | 374.74        | 13.17    | 521.30               | 478.34 | 353.26 | $[M+H]^+$       |                            |
| M                     | D   | 792.67         | 396.74        | 12.05    | 521.30               | 522.33 | 397.25 | $[M+H]^+$       |                            |
| M                     | E   | 806.67         | 403.74        | 12.21    | 521.30               | 536.34 | 411.26 | $[M+H]^+$       |                            |
| M                     | F   | 824.67         | 412.75        | 15.43    | 521.30               | 554.36 | 429.28 | $[M+H]^+$       |                            |
| M                     | I   | 790.67         | 395.76        | 15.54    | 521.30               | 520.38 | 395.30 | $[M+H]^+$       | average integral of MI, ML |
| M                     | K   | 805.67         | 403.27        | 9.36     | 521.30               | 535.39 | 410.31 | $[M+2H]^{2+}$   |                            |
| M                     | L   | 790.67         | 395.76        | 15.54    | 521.30               | 520.38 | 395.30 | $[M+H]^+$       | average integral of MI, ML |
| M                     | M   | 808.56         | 404.74        | 14.30    | 521.30               | 538.34 | 413.26 | $[M+H]^+$       |                            |
| M                     | N   | 791.67         | 396.24        | 11.30    | 521.30               | 521.34 | 396.26 | $[M+H]^+$       |                            |
| M                     | Q   | 805.67         | 403.25        | 11.51    | 521.30               | 535.35 | 410.27 | $[M+H]^+$       |                            |
| M                     | R   | 833.47         | 417.27        | 9.45     | 521.30               | 563.40 | 438.32 | $[M+2H]^{2+}$   |                            |
| M                     | S   | 764.67         | 382.74        | 11.69    | 521.30               | 494.33 | 369.25 | $[M+H]^+$       |                            |
| M                     | T   | 778.67         | 389.74        | 12.24    | 521.30               | 508.34 | 383.26 | $[M+H]^+$       |                            |
| M                     | V   | 776.67         | 388.75        | 14.84    | 521.30               | 506.36 | 381.28 | $[M+H]^+$       |                            |
| M                     | W   | 863.67         | 432.26        | 15.33    | 521.30               | 593.37 | 468.29 | $[M+H]^+$       |                            |
| M                     | Y   | 840.58         | 420.75        | 13.43    | 521.30               | 570.36 | 445.28 | $[M+H]^+$       |                            |
| W                     | A   | 803.50         | 402.26        | 14.28    | 576.33               | 478.34 | 353.26 | $[M+H]^+$       |                            |
| W                     | D   | 847.67         | 424.25        | 13.18    | 576.33               | 522.33 | 397.25 | $[M+H]^+$       |                            |
| W                     | E   | 861.66         | 431.26        | 13.11    | 576.33               | 536.34 | 411.26 | $[M+H]^+$       |                            |
| W                     | F   | 879.67         | 440.27        | 16.06    | 576.33               | 554.36 | 429.28 | $[M+H]^+$       |                            |
| W                     | I   | 845.75         | 423.28        | 16.27    | 576.33               | 520.38 | 395.30 | $[M+H]^+$       | average integral of WI, WL |
| W                     | K   | 860.75         | 430.78        | 10.31    | 576.33               | 535.39 | 410.31 | $[M+2H]^{2+}$   |                            |
| W                     | L   | 845.75         | 423.28        | 16.27    | 576.33               | 520.38 | 395.30 | $[M+H]^+$       | average integral of WI, WL |
| W                     | M   | 863.67         | 432.26        | 15.09    | 576.33               | 538.34 | 413.26 | $[M+H]^+$       |                            |
| W                     | N   | 846.67         | 423.76        | 12.45    | 576.33               | 521.34 | 396.26 | $[M+H]^+$       |                            |
| W                     | Q   | 860.75         | 430.76        | 12.52    | 576.33               | 535.35 | 410.27 | $[M+H]^+$       |                            |
| W                     | R   | 888.75         | 444.79        | 10.35    | 576.33               | 563.40 | 438.32 | $[M+2H]^{2+}$   |                            |
| W                     | S   | 819.67         | 410.25        | 12.81    | 576.33               | 494.33 | 369.25 | $[M+H]^+$       |                            |
| W                     | T   | 833.47         | 417.26        | 13.20    | 576.33               | 508.34 | 383.26 | $[M+H]^+$       |                            |
| W                     | V   | 831.67         | 416.27        | 15.71    | 576.33               | 506.36 | 381.28 | $[M+H]^+$       |                            |
| W                     | W   | 918.67         | 459.77        | 15.93    | 576.33               | 593.37 | 468.29 | $[M+H]^+$       |                            |
| W                     | Y   | 895.67         | 448.27        | 14.36    | 576.33               | 570.36 | 445.28 | $[M+H]^+$       |                            |
| Y                     | A   | 780.67         | 390.75        | 12.72    | 553.32               | 478.34 | 353.26 | $[M+H]^+$       |                            |
| Y                     | D   | 824.67         | 412.75        | 11.82    | 553.32               | 522.33 | 397.25 | $[M+H]^+$       |                            |
| Y                     | E   | 838.67         | 419.75        | 11.94    | 553.32               | 536.34 | 411.26 | $[M+H]^+$       |                            |
| Y                     | F   | 856.67         | 428.76        | 14.46    | 553.32               | 554.36 | 429.28 | $[M+H]^+$       |                            |
| Y                     | I   | 822.58         | 411.77        | 14.60    | 553.32               | 520.38 | 395.30 | $[M+H]^+$       | average integral of YI, YL |
| Y                     | K   | 837.67         | 419.28        | 9.33     | 553.32               | 535.39 | 410.31 | $[M+2H]^{2+}$   |                            |
| Y                     | L   | 822.58         | 411.77        | 14.60    | 553.32               | 520.38 | 395.30 | $[M+H]^+$       | average integral of YI, YL |
| Y                     | M   | 840.58         | 420.75        | 13.52    | 553.32               | 538.34 | 413.26 | $[M+H]^+$       |                            |
| Y                     | N   | 823.67         | 412.25        | 11.16    | 553.32               | 521.34 | 396.26 | $[M+H]^+$       |                            |
| Y                     | Q   | 837.67         | 419.26        | 11.32    | 553.32               | 535.35 | 410.27 | $[M+H]^+$       |                            |
| Y                     | R   | 865.75         | 433.28        | 9.34     | 553.32               | 563.40 | 438.32 | $[M+2H]^{2+}$   |                            |
| Y                     | S   | 796.67         | 398.75        | 11.49    | 553.32               | 494.33 | 369.25 | $[M+H]^+$       |                            |
| Y                     | T   | 810.67         | 405.75        | 11.86    | 553.32               | 508.34 | 383.26 | $[M+H]^+$       |                            |
| Y                     | V   | 808.56         | 404.76        | 14.02    | 553.32               | 506.36 | 381.28 | $[M+H]^+$       |                            |
| Y                     | W   | 895.67         | 448.27        | 14.51    | 553.32               | 593.37 | 468.29 | $[M+H]^+$       |                            |
| Y                     | Y   | 872.58         | 436.76        | 12.96    | 553.32               | 570.36 | 445.28 | $[M+H]^+$       |                            |

**Table S2. Characterization data of L2**

| $\beta^3$ -amino acid |     | Detected peaks                   |                                   |          | MS <sup>2</sup> fragment ions |        |        | Pull down assay                   |                            |
|-----------------------|-----|----------------------------------|-----------------------------------|----------|-------------------------------|--------|--------|-----------------------------------|----------------------------|
| 2nd                   | 5th | [M+H] <sup>+</sup> <sup>1+</sup> | [M+2H] <sup>+</sup> <sup>2+</sup> | Rt (min) | b4                            | y4     | y3     | Detected ion                      | Remark                     |
| D                     | A   | 732.47                           | 366.74                            | 11.31    | 505.29                        | 478.34 | 353.26 | [M+H] <sup>+</sup> <sup>1+</sup>  |                            |
| D                     | D   | 776.46                           | 388.73                            | 11.20    | 505.29                        | 522.33 | 397.25 | <b>y4</b>                         |                            |
| D                     | E   | 790.47                           | 395.74                            | 11.49    | 505.29                        | 536.34 | 411.26 | [M+H] <sup>+</sup> <sup>1+</sup>  |                            |
| D                     | F   | 808.49                           | 404.75                            | 13.04    | 505.29                        | 554.36 | 429.28 | [M+H] <sup>+</sup> <sup>1+</sup>  |                            |
| D                     | I   | 774.51                           | 387.76                            | 13.04    | 505.29                        | 520.38 | 395.30 | [M+H] <sup>+</sup> <sup>1+</sup>  | average integral of DI, DL |
| D                     | K   | 789.52                           | 395.26                            | 9.06     | 505.29                        | 535.39 | 410.31 | [M+2H] <sup>+</sup> <sup>2+</sup> |                            |
| D                     | L   | 774.51                           | 387.76                            | 13.04    | 505.29                        | 520.38 | 395.30 | [M+H] <sup>+</sup> <sup>1+</sup>  | average integral of DI, DL |
| D                     | M   | 792.47                           | 396.74                            | 12.16    | 505.29                        | 538.34 | 413.26 | [M+H] <sup>+</sup> <sup>1+</sup>  |                            |
| D                     | N   | 775.47                           | 388.24                            | 10.51    | 505.29                        | 521.34 | 396.26 | [M+H] <sup>+</sup> <sup>1+</sup>  |                            |
| D                     | Q   | 789.48                           | 395.24                            | 10.70    | 505.29                        | 535.35 | 410.27 | <b>y4</b>                         |                            |
| D                     | R   | 817.53                           | 409.27                            | 9.04     | 505.29                        | 563.40 | 438.32 | [M+2H] <sup>+</sup> <sup>2+</sup> |                            |
| D                     | S   | 748.46                           | 374.73                            | 10.88    | 505.29                        | 494.33 | 369.25 | [M+H] <sup>+</sup> <sup>1+</sup>  |                            |
| D                     | T   | 762.47                           | 381.74                            | 11.11    | 505.29                        | 508.34 | 383.26 | <b>b4</b>                         | average integral of ES, DT |
| D                     | V   | 760.49                           | 380.75                            | 12.48    | 505.29                        | 506.36 | 381.28 | [M+H] <sup>+</sup> <sup>1+</sup>  |                            |
| D                     | W   | 847.50                           | 424.25                            | 13.32    | 505.29                        | 593.37 | 468.29 | [M+H] <sup>+</sup> <sup>1+</sup>  |                            |
| D                     | Y   | 824.49                           | 412.75                            | 11.72    | 505.29                        | 570.36 | 445.28 | [M+H] <sup>+</sup> <sup>1+</sup>  |                            |
| E                     | A   | 746.48                           | 373.74                            | 11.54    | 519.30                        | 478.34 | 353.26 | [M+H] <sup>+</sup> <sup>1+</sup>  |                            |
| E                     | D   | 790.47                           | 395.74                            | 11.23    | 519.30                        | 522.33 | 397.25 | [M+H] <sup>+</sup> <sup>1+</sup>  |                            |
| E                     | E   | 804.48                           | 402.74                            | 11.40    | 519.30                        | 536.34 | 411.26 | [M+H] <sup>+</sup> <sup>1+</sup>  |                            |
| E                     | F   | 822.50                           | 411.75                            | 13.15    | 519.30                        | 554.36 | 429.28 | [M+H] <sup>+</sup> <sup>1+</sup>  |                            |
| E                     | I   | 788.52                           | 394.76                            | 13.15    | 519.30                        | 520.38 | 395.30 | [M+H] <sup>+</sup> <sup>1+</sup>  | average integral of EI, EL |
| E                     | K   | 803.53                           | 402.27                            | 9.21     | 519.30                        | 535.39 | 410.31 | [M+2H] <sup>+</sup> <sup>2+</sup> |                            |
| E                     | L   | 788.52                           | 394.76                            | 13.15    | 519.30                        | 520.38 | 395.30 | [M+H] <sup>+</sup> <sup>1+</sup>  | average integral of EI, EL |
| E                     | M   | 806.48                           | 403.74                            | 12.34    | 519.30                        | 538.34 | 413.26 | [M+H] <sup>+</sup> <sup>1+</sup>  |                            |
| E                     | N   | 789.48                           | 395.24                            | 10.70    | 519.30                        | 521.34 | 396.26 | <b>b4</b>                         |                            |
| E                     | Q   | 803.49                           | 402.25                            | 10.95    | 519.30                        | 535.35 | 410.27 | [M+H] <sup>+</sup> <sup>1+</sup>  |                            |
| E                     | R   | 831.54                           | 416.27                            | 9.21     | 519.30                        | 563.40 | 438.32 | [M+2H] <sup>+</sup> <sup>2+</sup> |                            |
| E                     | S   | 762.47                           | 381.74                            | 11.03    | 519.30                        | 494.33 | 369.25 | <b>b4</b>                         | average integral of ES, DT |
| E                     | T   | 776.48                           | 388.74                            | 11.20    | 519.30                        | 508.34 | 383.26 | <b>b4</b>                         |                            |
| E                     | V   | 774.50                           | 387.75                            | 12.62    | 519.30                        | 506.36 | 381.28 | [M+H] <sup>+</sup> <sup>1+</sup>  |                            |
| E                     | W   | 861.51                           | 431.26                            | 13.56    | 519.30                        | 593.37 | 468.29 | [M+H] <sup>+</sup> <sup>1+</sup>  |                            |
| E                     | Y   | 838.50                           | 419.75                            | 11.88    | 519.30                        | 570.36 | 445.28 | [M+H] <sup>+</sup> <sup>1+</sup>  |                            |
| K                     | A   | 745.53                           | 373.27                            | 9.09     | 518.35                        | 478.34 | 353.26 | [M+2H] <sup>+</sup> <sup>2+</sup> |                            |
| K                     | D   | 789.52                           | 395.26                            | 9.33     | 518.35                        | 522.33 | 397.25 | [M+2H] <sup>+</sup> <sup>2+</sup> |                            |
| K                     | E   | 803.53                           | 402.27                            | 9.28     | 518.35                        | 536.34 | 411.26 | [M+2H] <sup>+</sup> <sup>2+</sup> |                            |
| K                     | F   | 821.55                           | 411.28                            | 10.31    | 518.35                        | 554.36 | 429.28 | [M+2H] <sup>+</sup> <sup>2+</sup> |                            |
| K                     | I   | 787.57                           | 394.29                            | 10.19    | 518.35                        | 520.38 | 395.30 | [M+2H] <sup>+</sup> <sup>2+</sup> | average integral of KI, KL |
| K                     | K   | 802.58                           | 401.79                            | 7.60     | 518.35                        | 535.39 | 410.31 | [M+2H] <sup>+</sup> <sup>2+</sup> |                            |
| K                     | L   | 787.57                           | 394.29                            | 10.19    | 518.35                        | 520.38 | 395.30 | [M+2H] <sup>+</sup> <sup>2+</sup> | average integral of KI, KL |
| K                     | M   | 805.53                           | 403.27                            | 9.69     | 518.35                        | 538.34 | 413.26 | [M+2H] <sup>+</sup> <sup>2+</sup> |                            |
| K                     | N   | 788.53                           | 394.77                            | 8.76     | 518.35                        | 521.34 | 396.26 | [M+2H] <sup>+</sup> <sup>2+</sup> |                            |
| K                     | Q   | 802.54                           | 401.77                            | 8.85     | 518.35                        | 535.35 | 410.27 | [M+2H] <sup>+</sup> <sup>2+</sup> |                            |
| K                     | R   | 830.59                           | 415.80                            | 7.40     | 518.35                        | 563.40 | 438.32 | [M+2H] <sup>+</sup> <sup>2+</sup> | average integral of RK, KR |
| K                     | S   | 761.52                           | 381.26                            | 8.86     | 518.35                        | 494.33 | 369.25 | [M+2H] <sup>+</sup> <sup>2+</sup> |                            |
| K                     | T   | 775.53                           | 388.27                            | 9.03     | 518.35                        | 508.34 | 383.26 | [M+2H] <sup>+</sup> <sup>2+</sup> |                            |
| K                     | V   | 773.55                           | 387.28                            | 9.80     | 518.35                        | 506.36 | 381.28 | [M+2H] <sup>+</sup> <sup>2+</sup> |                            |
| K                     | W   | 860.56                           | 430.78                            | 10.64    | 518.35                        | 593.37 | 468.29 | [M+2H] <sup>+</sup> <sup>2+</sup> |                            |
| K                     | Y   | 837.55                           | 419.28                            | 9.45     | 518.35                        | 570.36 | 445.28 | [M+2H] <sup>+</sup> <sup>2+</sup> |                            |
| R                     | A   | 773.54                           | 387.27                            | 9.19     | 546.36                        | 478.34 | 353.26 | [M+2H] <sup>+</sup> <sup>2+</sup> |                            |
| R                     | D   | 817.53                           | 409.27                            | 9.47     | 546.36                        | 522.33 | 397.25 | [M+2H] <sup>+</sup> <sup>2+</sup> |                            |
| R                     | E   | 831.54                           | 416.27                            | 9.34     | 546.36                        | 536.34 | 411.26 | [M+2H] <sup>+</sup> <sup>2+</sup> |                            |
| R                     | F   | 849.56                           | 425.28                            | 10.49    | 546.36                        | 554.36 | 429.28 | [M+2H] <sup>+</sup> <sup>2+</sup> |                            |
| R                     | I   | 815.58                           | 408.29                            | 10.32    | 546.36                        | 520.38 | 395.30 | [M+2H] <sup>+</sup> <sup>2+</sup> | average integral of RI, RL |
| R                     | K   | 830.59                           | 415.80                            | 7.34     | 546.36                        | 535.39 | 410.31 | [M+2H] <sup>+</sup> <sup>2+</sup> | average integral of RK, KR |
| R                     | L   | 815.58                           | 408.29                            | 10.42    | 546.36                        | 520.38 | 395.30 | [M+2H] <sup>+</sup> <sup>2+</sup> | average integral of RI, RL |
| R                     | M   | 833.54                           | 417.27                            | 9.81     | 546.36                        | 538.34 | 413.26 | [M+2H] <sup>+</sup> <sup>2+</sup> |                            |
| R                     | N   | 816.54                           | 408.77                            | 8.84     | 546.36                        | 521.34 | 396.26 | [M+2H] <sup>+</sup> <sup>2+</sup> |                            |
| R                     | Q   | 830.55                           | 415.78                            | 8.91     | 546.36                        | 535.35 | 410.27 | [M+2H] <sup>+</sup> <sup>2+</sup> |                            |
| R                     | R   | 858.60                           | 429.80                            | 7.65     | 546.36                        | 563.40 | 438.32 | [M+2H] <sup>+</sup> <sup>2+</sup> |                            |
| R                     | S   | 789.53                           | 395.27                            | 8.94     | 546.36                        | 494.33 | 369.25 | [M+2H] <sup>+</sup> <sup>2+</sup> |                            |
| R                     | T   | 803.54                           | 402.27                            | 9.08     | 546.36                        | 508.34 | 383.26 | [M+2H] <sup>+</sup> <sup>2+</sup> |                            |
| R                     | V   | 801.56                           | 401.28                            | 9.91     | 546.36                        | 506.36 | 381.28 | [M+2H] <sup>+</sup> <sup>2+</sup> |                            |
| R                     | W   | 888.57                           | 444.79                            | 10.74    | 546.36                        | 593.37 | 468.29 | [M+2H] <sup>+</sup> <sup>2+</sup> |                            |
| R                     | Y   | 865.56                           | 433.28                            | 9.55     | 546.36                        | 570.36 | 445.28 | [M+2H] <sup>+</sup> <sup>2+</sup> |                            |

**Table S3. Characterization data of L3**

| $\beta^3$ -amino acid |     | Detected peaks                   |                                   |          | $MS^2$ fragment ions |        |        | Pull down assay                  |                                    |
|-----------------------|-----|----------------------------------|-----------------------------------|----------|----------------------|--------|--------|----------------------------------|------------------------------------|
| 2nd                   | 5th | [M+H] <sup>+</sup> <sup>1+</sup> | [M+2H] <sup>+</sup> <sup>2+</sup> | Rt (min) | b4                   | y4     | y3     | Detected ion                     | Remark                             |
| A                     | A   | 688.48                           | 344.74                            | 12.00    | 461.30               | 478.34 | 353.26 | [M+H] <sup>+</sup> <sup>1+</sup> |                                    |
| A                     | D   | 732.47                           | 366.74                            | 11.34    | 461.30               | 522.33 | 397.25 | [M+H] <sup>+</sup> <sup>1+</sup> |                                    |
| A                     | E   | 746.48                           | 373.74                            | 11.42    | 461.30               | 536.34 | 411.26 | [M+H] <sup>+</sup> <sup>1+</sup> |                                    |
| A                     | F   | 764.50                           | 382.75                            | 14.20    | 461.30               | 554.36 | 429.28 | b4                               |                                    |
| A                     | I   | 730.52                           | 365.76                            | 14.38    | 461.30               | 520.38 | 395.30 | b4                               | average integral of AI, AL         |
| A                     | K   | 745.53                           | 373.27                            | 8.93     | 461.30               | 535.39 | 410.31 | [M+H] <sup>+</sup> <sup>1+</sup> |                                    |
| A                     | L   | 730.52                           | 365.76                            | 14.38    | 461.30               | 520.38 | 395.30 | [M+H] <sup>+</sup> <sup>1+</sup> | average integral of AI, AL         |
| A                     | M   | 748.48                           | 374.74                            | 13.20    | 461.30               | 538.34 | 413.26 | [M+H] <sup>+</sup> <sup>1+</sup> |                                    |
| A                     | N   | 731.48                           | 366.24                            | 10.66    | 461.30               | 521.34 | 396.26 | [M+H] <sup>+</sup> <sup>1+</sup> |                                    |
| A                     | Q   | 745.49                           | 373.25                            | 10.84    | 461.30               | 535.35 | 410.27 | [M+H] <sup>+</sup> <sup>1+</sup> |                                    |
| A                     | R   | 773.54                           | 387.27                            | 8.93     | 461.30               | 563.40 | 438.32 | [M+H] <sup>+</sup> <sup>1+</sup> |                                    |
| A                     | S   | 704.47                           | 352.74                            | 10.95    | 461.30               | 494.33 | 369.25 | [M+H] <sup>+</sup> <sup>1+</sup> |                                    |
| A                     | T   | 718.48                           | 359.74                            | 11.39    | 461.30               | 508.34 | 383.26 | [M+H] <sup>+</sup> <sup>1+</sup> |                                    |
| A                     | V   | 716.50                           | 358.75                            | 13.82    | 461.30               | 506.36 | 381.28 | [M+H] <sup>+</sup> <sup>1+</sup> |                                    |
| A                     | W   | 803.51                           | 402.26                            | 14.28    | 461.30               | 593.37 | 468.29 | b4                               |                                    |
| A                     | Y   | 780.50                           | 390.75                            | 12.38    | 461.30               | 570.36 | 445.28 | [M+H] <sup>+</sup> <sup>1+</sup> |                                    |
| I                     | A   | 730.52                           | 365.76                            | 14.54    | 503.34               | 478.34 | 353.26 | b4                               |                                    |
| I                     | D   | 774.51                           | 387.76                            | 12.79    | 503.34               | 522.33 | 397.25 | [M+H] <sup>+</sup> <sup>1+</sup> |                                    |
| I                     | E   | 788.52                           | 394.76                            | 12.95    | 503.34               | 536.34 | 411.26 | [M+H] <sup>+</sup> <sup>1+</sup> |                                    |
| I                     | F   | 806.54                           | 403.77                            | 16.56    | 503.34               | 554.36 | 429.28 | [M+H] <sup>+</sup> <sup>1+</sup> |                                    |
| I                     | I   | 772.56                           | 386.78                            | 16.90    | 503.34               | 520.38 | 395.30 | [M+H] <sup>+</sup> <sup>1+</sup> | average integral of II, IL, LI, LI |
| I                     | K   | 787.57                           | 394.29                            | 9.84     | 503.34               | 535.39 | 410.31 | [M+H] <sup>+</sup> <sup>1+</sup> |                                    |
| I                     | L   | 772.56                           | 386.78                            | 17.22    | 503.34               | 520.38 | 395.30 | [M+H] <sup>+</sup> <sup>1+</sup> | average integral of II, IL, LI, LI |
| I                     | M   | 790.52                           | 395.76                            | 15.49    | 503.34               | 538.34 | 413.26 | [M+H] <sup>+</sup> <sup>1+</sup> |                                    |
| I                     | N   | 773.52                           | 387.26                            | 11.92    | 503.34               | 521.34 | 396.26 | [M+H] <sup>+</sup> <sup>1+</sup> |                                    |
| I                     | Q   | 787.53                           | 394.27                            | 12.10    | 503.34               | 535.35 | 410.27 | [M+H] <sup>+</sup> <sup>1+</sup> |                                    |
| I                     | R   | 815.58                           | 408.29                            | 9.91     | 503.34               | 563.40 | 438.32 | [M+H] <sup>+</sup> <sup>1+</sup> |                                    |
| I                     | S   | 746.51                           | 373.76                            | 12.39    | 503.34               | 494.33 | 369.25 | b4                               |                                    |
| I                     | T   | 760.52                           | 380.76                            | 13.13    | 503.34               | 508.34 | 383.26 | [M+H] <sup>+</sup> <sup>1+</sup> |                                    |
| I                     | V   | 758.54                           | 379.77                            | 16.50    | 503.34               | 506.36 | 381.28 | b4                               |                                    |
| I                     | W   | 845.55                           | 423.28                            | 16.62    | 503.34               | 593.37 | 468.29 | [M+H] <sup>+</sup> <sup>1+</sup> | average integral of IW, LW         |
| I                     | Y   | 822.54                           | 411.77                            | 14.49    | 503.34               | 570.36 | 445.28 | y4                               |                                    |
| L                     | A   | 730.52                           | 365.76                            | 14.54    | 503.34               | 478.34 | 353.26 | [M+H] <sup>+</sup> <sup>1+</sup> |                                    |
| L                     | D   | 774.51                           | 387.76                            | 12.79    | 503.34               | 522.33 | 397.25 | [M+H] <sup>+</sup> <sup>1+</sup> |                                    |
| L                     | E   | 788.52                           | 394.76                            | 13.11    | 503.34               | 536.34 | 411.26 | [M+H] <sup>+</sup> <sup>1+</sup> |                                    |
| L                     | F   | 806.54                           | 403.77                            | 16.72    | 503.34               | 554.36 | 429.28 | [M+H] <sup>+</sup> <sup>1+</sup> |                                    |
| L                     | I   | 772.56                           | 386.78                            | 16.90    | 503.34               | 520.38 | 395.30 | [M+H] <sup>+</sup> <sup>1+</sup> | average integral of II, IL, LI, LI |
| L                     | K   | 787.57                           | 394.29                            | 9.94     | 503.34               | 535.39 | 410.31 | [M+H] <sup>+</sup> <sup>1+</sup> |                                    |
| L                     | L   | 772.56                           | 386.78                            | 17.22    | 503.34               | 520.38 | 395.30 | [M+H] <sup>+</sup> <sup>1+</sup> | average integral of II, IL, LI, LI |
| L                     | M   | 790.52                           | 395.76                            | 15.72    | 503.34               | 538.34 | 413.26 | [M+H] <sup>+</sup> <sup>1+</sup> |                                    |
| L                     | N   | 773.52                           | 387.26                            | 12.04    | 503.34               | 521.34 | 396.26 | [M+H] <sup>+</sup> <sup>1+</sup> |                                    |
| L                     | Q   | 787.53                           | 394.27                            | 12.22    | 503.34               | 535.35 | 410.27 | [M+H] <sup>+</sup> <sup>1+</sup> |                                    |
| L                     | R   | 815.58                           | 408.29                            | 10.03    | 503.34               | 563.40 | 438.32 | [M+H] <sup>+</sup> <sup>1+</sup> |                                    |
| L                     | S   | 746.51                           | 373.76                            | 12.39    | 503.34               | 494.33 | 369.25 | b4                               |                                    |
| L                     | T   | 760.52                           | 380.76                            | 13.36    | 503.34               | 508.34 | 383.26 | [M+H] <sup>+</sup> <sup>1+</sup> |                                    |
| L                     | V   | 758.54                           | 379.77                            | 16.50    | 503.34               | 506.36 | 381.28 | b4                               |                                    |
| L                     | W   | 845.55                           | 423.28                            | 16.62    | 503.34               | 593.37 | 468.29 | [M+H] <sup>+</sup> <sup>1+</sup> | average integral of IW, LW         |
| L                     | Y   | 822.54                           | 411.77                            | 14.63    | 503.34               | 570.36 | 445.28 | y4                               |                                    |
| V                     | A   | 716.50                           | 358.75                            | 13.53    | 489.32               | 478.34 | 353.26 | [M+H] <sup>+</sup> <sup>1+</sup> |                                    |
| V                     | D   | 760.49                           | 380.75                            | 12.15    | 489.32               | 522.33 | 397.25 | [M+H] <sup>+</sup> <sup>1+</sup> |                                    |
| V                     | E   | 774.50                           | 387.75                            | 12.31    | 489.32               | 536.34 | 411.26 | [M+H] <sup>+</sup> <sup>1+</sup> |                                    |
| V                     | F   | 792.52                           | 396.76                            | 15.72    | 489.32               | 554.36 | 429.28 | [M+H] <sup>+</sup> <sup>1+</sup> |                                    |
| V                     | I   | 758.54                           | 379.77                            | 16.18    | 489.32               | 520.38 | 395.30 | y4                               | average integral of VI, VL         |
| V                     | K   | 773.55                           | 387.28                            | 9.38     | 489.32               | 535.39 | 410.31 | [M+H] <sup>+</sup> <sup>1+</sup> |                                    |
| V                     | L   | 758.54                           | 379.77                            | 16.18    | 489.32               | 520.38 | 395.30 | y4                               | average integral of VI, VL         |
| V                     | M   | 776.50                           | 388.75                            | 14.61    | 489.32               | 538.34 | 413.26 | y4                               |                                    |
| V                     | N   | 759.50                           | 380.25                            | 11.31    | 489.32               | 521.34 | 396.26 | [M+H] <sup>+</sup> <sup>1+</sup> |                                    |
| V                     | Q   | 773.51                           | 387.26                            | 11.49    | 489.32               | 535.35 | 410.27 | [M+H] <sup>+</sup> <sup>1+</sup> |                                    |
| V                     | R   | 801.56                           | 401.28                            | 9.42     | 489.32               | 563.40 | 438.32 | [M+H] <sup>+</sup> <sup>1+</sup> |                                    |
| V                     | S   | 732.49                           | 366.75                            | 11.71    | 489.32               | 494.33 | 369.25 | [M+H] <sup>+</sup> <sup>1+</sup> |                                    |
| V                     | T   | 746.50                           | 373.75                            | 12.39    | 489.32               | 508.34 | 383.26 | b4                               |                                    |
| V                     | V   | 744.52                           | 372.76                            | 15.36    | 489.32               | 506.36 | 381.28 | [M+H] <sup>+</sup> <sup>1+</sup> |                                    |
| V                     | W   | 831.53                           | 416.27                            | 15.74    | 489.32               | 593.37 | 468.29 | [M+H] <sup>+</sup> <sup>1+</sup> |                                    |
| V                     | Y   | 808.52                           | 404.76                            | 13.68    | 489.32               | 570.36 | 445.28 | [M+H] <sup>+</sup> <sup>1+</sup> |                                    |

**Table S4. Characterization data of L4**

| $\beta^3$ -amino acid |     | Detected peaks                   |                                   |          | MS <sup>2</sup> fragment ions |        |        | Pull down assay                   |                             |
|-----------------------|-----|----------------------------------|-----------------------------------|----------|-------------------------------|--------|--------|-----------------------------------|-----------------------------|
| 2nd                   | 5th | [M+H] <sup>+</sup> <sup>1+</sup> | [M+2H] <sup>+</sup> <sup>2+</sup> | Rt (min) | b4                            | y4     | y3     | Detected ion                      | Remark                      |
| N                     | A   | 731.72                           | 366.36                            | 10.73    | 504.30                        | 478.34 | 353.26 | [M+H] <sup>+</sup> <sup>1+</sup>  |                             |
| N                     | D   | 775.77                           | 388.39                            | 10.93    | 504.30                        | 522.33 | 397.25 | [M+H] <sup>+</sup> <sup>1+</sup>  |                             |
| N                     | E   | 789.68                           | 395.34                            | 10.82    | 504.30                        | 536.34 | 411.26 | [M+H] <sup>+</sup> <sup>1+</sup>  |                             |
| N                     | F   | 807.85                           | 404.43                            | 12.43    | 504.30                        | 554.36 | 429.28 | [M+H] <sup>+</sup> <sup>1+</sup>  |                             |
| N                     | I   | 773.84                           | 387.42                            | 12.19    | 504.30                        | 520.38 | 395.30 | [M+H] <sup>+</sup> <sup>1+</sup>  | average integral of NI, NL  |
| N                     | K   | 788.67                           | 394.84                            | 8.63     | 504.30                        | 535.39 | 410.31 | [M+2H] <sup>+</sup> <sup>2+</sup> |                             |
| N                     | L   | 773.87                           | 387.44                            | 12.31    | 504.30                        | 520.38 | 395.30 | [M+H] <sup>+</sup> <sup>1+</sup>  | average integral of NI, NL  |
| N                     | M   | 791.82                           | 396.41                            | 11.53    | 504.30                        | 538.34 | 413.26 | [M+H] <sup>+</sup> <sup>1+</sup>  |                             |
| N                     | N   | 774.80                           | 387.90                            | 10.33    | 504.30                        | 521.34 | 396.26 | [M+H] <sup>+</sup> <sup>1+</sup>  |                             |
| N                     | Q   | 788.73                           | 394.87                            | 10.38    | 504.30                        | 535.35 | 410.27 | [M+H] <sup>+</sup> <sup>1+</sup>  |                             |
| N                     | R   | 816.82                           | 408.91                            | 8.63     | 504.30                        | 563.40 | 438.32 | [M+2H] <sup>+</sup> <sup>2+</sup> |                             |
| N                     | S   | 747.47                           | 374.24                            | 10.46    | 504.30                        | 494.33 | 369.25 | y4                                |                             |
| N                     | T   | 761.81                           | 381.41                            | 10.65    | 504.30                        | 508.34 | 383.26 | y4                                |                             |
| N                     | V   | 759.81                           | 380.41                            | 11.69    | 504.30                        | 506.36 | 381.28 | [M+H] <sup>+</sup> <sup>1+</sup>  |                             |
| N                     | W   | 846.73                           | 423.87                            | 12.64    | 504.30                        | 593.37 | 468.29 | [M+H] <sup>+</sup> <sup>1+</sup>  |                             |
| N                     | Y   | 823.76                           | 412.38                            | 11.24    | 504.30                        | 570.36 | 445.28 | [M+H] <sup>+</sup> <sup>1+</sup>  |                             |
| Q                     | A   | 745.83                           | 373.42                            | 10.96    | 518.31                        | 478.34 | 353.26 | [M+H] <sup>+</sup> <sup>1+</sup>  |                             |
| Q                     | D   | 789.78                           | 395.39                            | 10.94    | 518.31                        | 522.33 | 397.25 | [M+H] <sup>+</sup> <sup>1+</sup>  |                             |
| Q                     | E   | 803.70                           | 402.35                            | 11.02    | 518.31                        | 536.34 | 411.26 | [M+H] <sup>+</sup> <sup>1+</sup>  |                             |
| Q                     | F   | 821.79                           | 411.40                            | 12.43    | 518.31                        | 554.36 | 429.28 | [M+H] <sup>+</sup> <sup>1+</sup>  |                             |
| Q                     | I   | 787.88                           | 394.44                            | 12.25    | 518.31                        | 520.38 | 395.30 | [M+H] <sup>+</sup> <sup>1+</sup>  | average integral of QI, QL  |
| Q                     | K   | 802.75                           | 401.88                            | 8.85     | 518.31                        | 535.39 | 410.31 | [M+2H] <sup>+</sup> <sup>2+</sup> |                             |
| Q                     | L   | 787.88                           | 394.44                            | 12.35    | 518.31                        | 520.38 | 395.30 | [M+H] <sup>+</sup> <sup>1+</sup>  | average integral of QI, QL  |
| Q                     | M   | 805.84                           | 403.42                            | 11.66    | 518.31                        | 538.34 | 413.26 | [M+H] <sup>+</sup> <sup>1+</sup>  |                             |
| Q                     | N   | 788.73                           | 394.87                            | 10.45    | 518.31                        | 521.34 | 396.26 | [M+H] <sup>+</sup> <sup>1+</sup>  |                             |
| Q                     | Q   | 802.72                           | 401.86                            | 10.66    | 518.31                        | 535.35 | 410.27 | [M+H] <sup>+</sup> <sup>1+</sup>  |                             |
| Q                     | R   | 830.89                           | 415.95                            | 8.89     | 518.31                        | 563.40 | 438.32 | [M+2H] <sup>+</sup> <sup>2+</sup> |                             |
| Q                     | S   | 761.81                           | 381.41                            | 10.65    | 518.31                        | 494.33 | 369.25 | y4                                |                             |
| Q                     | T   | 775.78                           | 388.39                            | 10.85    | 518.31                        | 508.34 | 383.26 | [M+H] <sup>+</sup> <sup>1+</sup>  |                             |
| Q                     | V   | 773.84                           | 387.42                            | 11.83    | 518.31                        | 506.36 | 381.28 | [M+H] <sup>+</sup> <sup>1+</sup>  |                             |
| Q                     | W   | 860.82                           | 430.91                            | 12.84    | 518.31                        | 593.37 | 468.29 | [M+H] <sup>+</sup> <sup>1+</sup>  |                             |
| Q                     | Y   | 837.73                           | 419.37                            | 11.32    | 518.31                        | 570.36 | 445.28 | [M+H] <sup>+</sup> <sup>1+</sup>  |                             |
| S                     | A   | 704.77                           | 352.89                            | 10.95    | 477.29                        | 478.34 | 353.26 | [M+H] <sup>+</sup> <sup>1+</sup>  |                             |
| S                     | D   | 748.79                           | 374.90                            | 10.97    | 477.29                        | 522.33 | 397.25 | [M+H] <sup>+</sup> <sup>1+</sup>  |                             |
| S                     | E   | 762.83                           | 381.92                            | 10.94    | 477.29                        | 536.34 | 411.26 | [M+H] <sup>+</sup> <sup>1+</sup>  |                             |
| S                     | F   | 780.77                           | 390.89                            | 12.69    | 477.29                        | 554.36 | 429.28 | [M+H] <sup>+</sup> <sup>1+</sup>  |                             |
| S                     | I   | 746.77                           | 373.89                            | 12.53    | 477.29                        | 520.38 | 395.30 | [M+H] <sup>+</sup> <sup>1+</sup>  | average integroal of SI, SL |
| S                     | K   | 761.80                           | 381.40                            | 8.70     | 477.29                        | 535.39 | 410.31 | [M+2H] <sup>+</sup> <sup>2+</sup> |                             |
| S                     | L   | 746.77                           | 373.89                            | 12.60    | 477.29                        | 520.38 | 395.30 | [M+H] <sup>+</sup> <sup>1+</sup>  | average integroal of SI, SL |
| S                     | M   | 764.48                           | 382.74                            | 11.79    | 477.29                        | 538.34 | 413.26 | [M+H] <sup>+</sup> <sup>1+</sup>  |                             |
| S                     | N   | 747.72                           | 374.36                            | 10.42    | 477.29                        | 521.34 | 396.26 | b4                                |                             |
| S                     | Q   | 761.81                           | 381.41                            | 10.52    | 477.29                        | 535.35 | 410.27 | y4                                |                             |
| S                     | R   | 789.77                           | 395.39                            | 8.67     | 477.29                        | 563.40 | 438.32 | [M+2H] <sup>+</sup> <sup>2+</sup> |                             |
| S                     | S   | 720.74                           | 360.87                            | 10.59    | 477.29                        | 494.33 | 369.25 | [M+H] <sup>+</sup> <sup>1+</sup>  |                             |
| S                     | T   | 734.78                           | 367.89                            | 10.75    | 477.29                        | 508.34 | 383.26 | [M+H] <sup>+</sup> <sup>1+</sup>  |                             |
| S                     | V   | 732.75                           | 366.88                            | 11.94    | 477.29                        | 506.36 | 381.28 | [M+H] <sup>+</sup> <sup>1+</sup>  |                             |
| S                     | W   | 819.80                           | 410.40                            | 12.97    | 477.29                        | 593.37 | 468.29 | [M+H] <sup>+</sup> <sup>1+</sup>  |                             |
| S                     | Y   | 796.87                           | 398.94                            | 11.36    | 477.29                        | 570.36 | 445.28 | [M+H] <sup>+</sup> <sup>1+</sup>  |                             |
| T                     | A   | 718.84                           | 359.92                            | 11.11    | 491.30                        | 478.34 | 353.26 | [M+H] <sup>+</sup> <sup>1+</sup>  |                             |
| T                     | D   | 762.83                           | 381.92                            | 11.06    | 491.30                        | 522.33 | 397.25 | [M+H] <sup>+</sup> <sup>1+</sup>  |                             |
| T                     | E   | 776.67                           | 388.84                            | 11.08    | 491.30                        | 536.34 | 411.26 | [M+H] <sup>+</sup> <sup>1+</sup>  |                             |
| T                     | F   | 794.73                           | 397.87                            | 10.61    | 491.30                        | 554.36 | 429.28 | [M+H] <sup>+</sup> <sup>1+</sup>  |                             |
| T                     | I   | 760.86                           | 380.93                            | 13.08    | 491.30                        | 520.38 | 395.30 | [M+H] <sup>+</sup> <sup>1+</sup>  | average integral of TI, TL  |
| T                     | K   | 775.63                           | 388.32                            | 8.68     | 491.30                        | 535.39 | 410.31 | [M+2H] <sup>+</sup> <sup>2+</sup> |                             |
| T                     | L   | 760.86                           | 380.93                            | 13.08    | 491.30                        | 520.38 | 395.30 | [M+H] <sup>+</sup> <sup>1+</sup>  | average integral of TI, TL  |
| T                     | M   | 778.75                           | 389.88                            | 12.25    | 491.30                        | 538.34 | 413.26 | [M+H] <sup>+</sup> <sup>1+</sup>  |                             |
| T                     | N   | 761.81                           | 381.41                            | 10.52    | 491.30                        | 521.34 | 396.26 | y4                                |                             |
| T                     | Q   | 775.79                           | 388.40                            | 10.60    | 491.30                        | 535.35 | 410.27 | [M+H] <sup>+</sup> <sup>1+</sup>  |                             |
| T                     | R   | 803.79                           | 402.40                            | 8.71     | 491.30                        | 563.40 | 438.32 | [M+2H] <sup>+</sup> <sup>2+</sup> |                             |
| T                     | S   | 734.73                           | 367.87                            | 10.65    | 491.30                        | 494.33 | 369.25 | [M+H] <sup>+</sup> <sup>1+</sup>  |                             |
| T                     | T   | 748.78                           | 374.89                            | 10.88    | 491.30                        | 508.34 | 383.26 | [M+H] <sup>+</sup> <sup>1+</sup>  |                             |
| T                     | V   | 746.83                           | 373.92                            | 12.37    | 491.30                        | 506.36 | 381.28 | [M+H] <sup>+</sup> <sup>1+</sup>  |                             |
| T                     | W   | 833.84                           | 417.42                            | 13.51    | 491.30                        | 593.37 | 468.29 | [M+H] <sup>+</sup> <sup>1+</sup>  |                             |
| T                     | Y   | 810.67                           | 405.84                            | 11.68    | 491.30                        | 570.36 | 445.28 | [M+H] <sup>+</sup> <sup>1+</sup>  |                             |

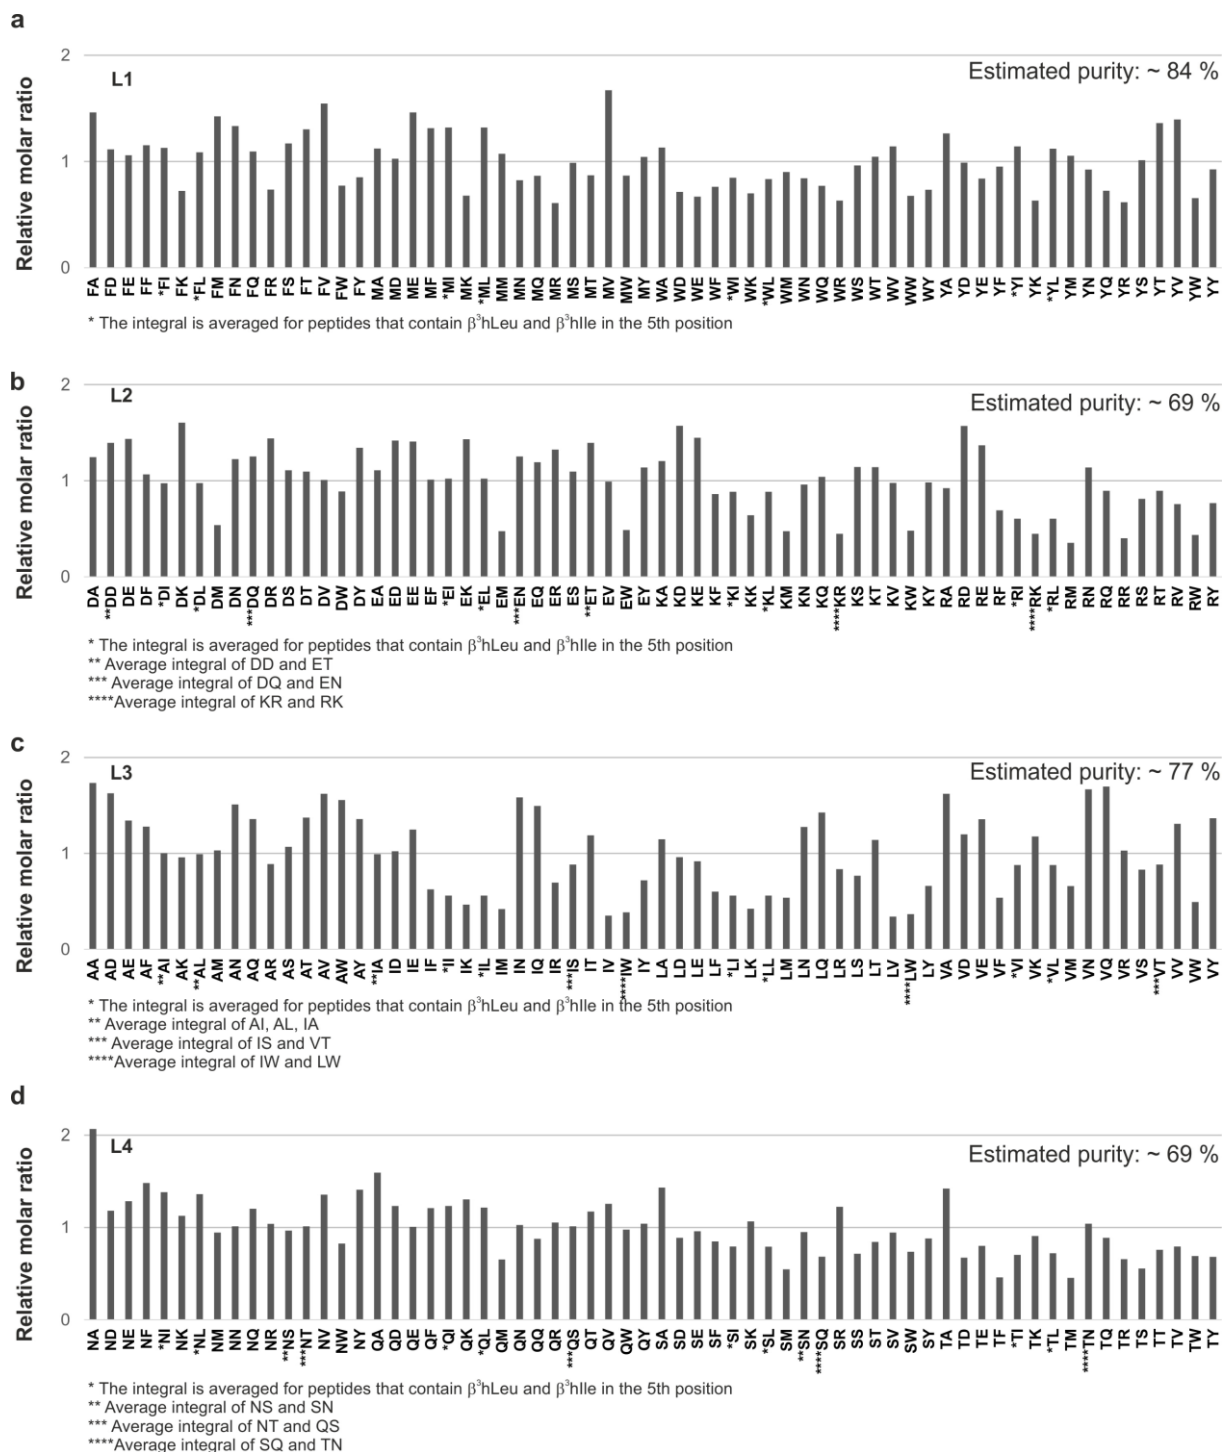

**Figure S1. Estimation of equimolarity and purity of the 64-membered sub-libraries.**

a) L1 b) L2 c) L3 d) L4. Estimations were based on peak area integrations of HPLC-MS measurements. Equimolarity was estimated using the following formula:  $\text{AUC}_{\text{compound}} / (\text{AUC}_{\text{total}} / 64)$ . The relative value of 1 indicates equimolar concentration. Purity was estimated using the following formula:  $\text{AUC}_{\text{compound}} / \text{AUC}_{\text{total}} * 100$ . Single letter amino acid codes are corresponding to the homologous  $\beta^3$ -amino acid used in position 2 and 5 of the foldamers.

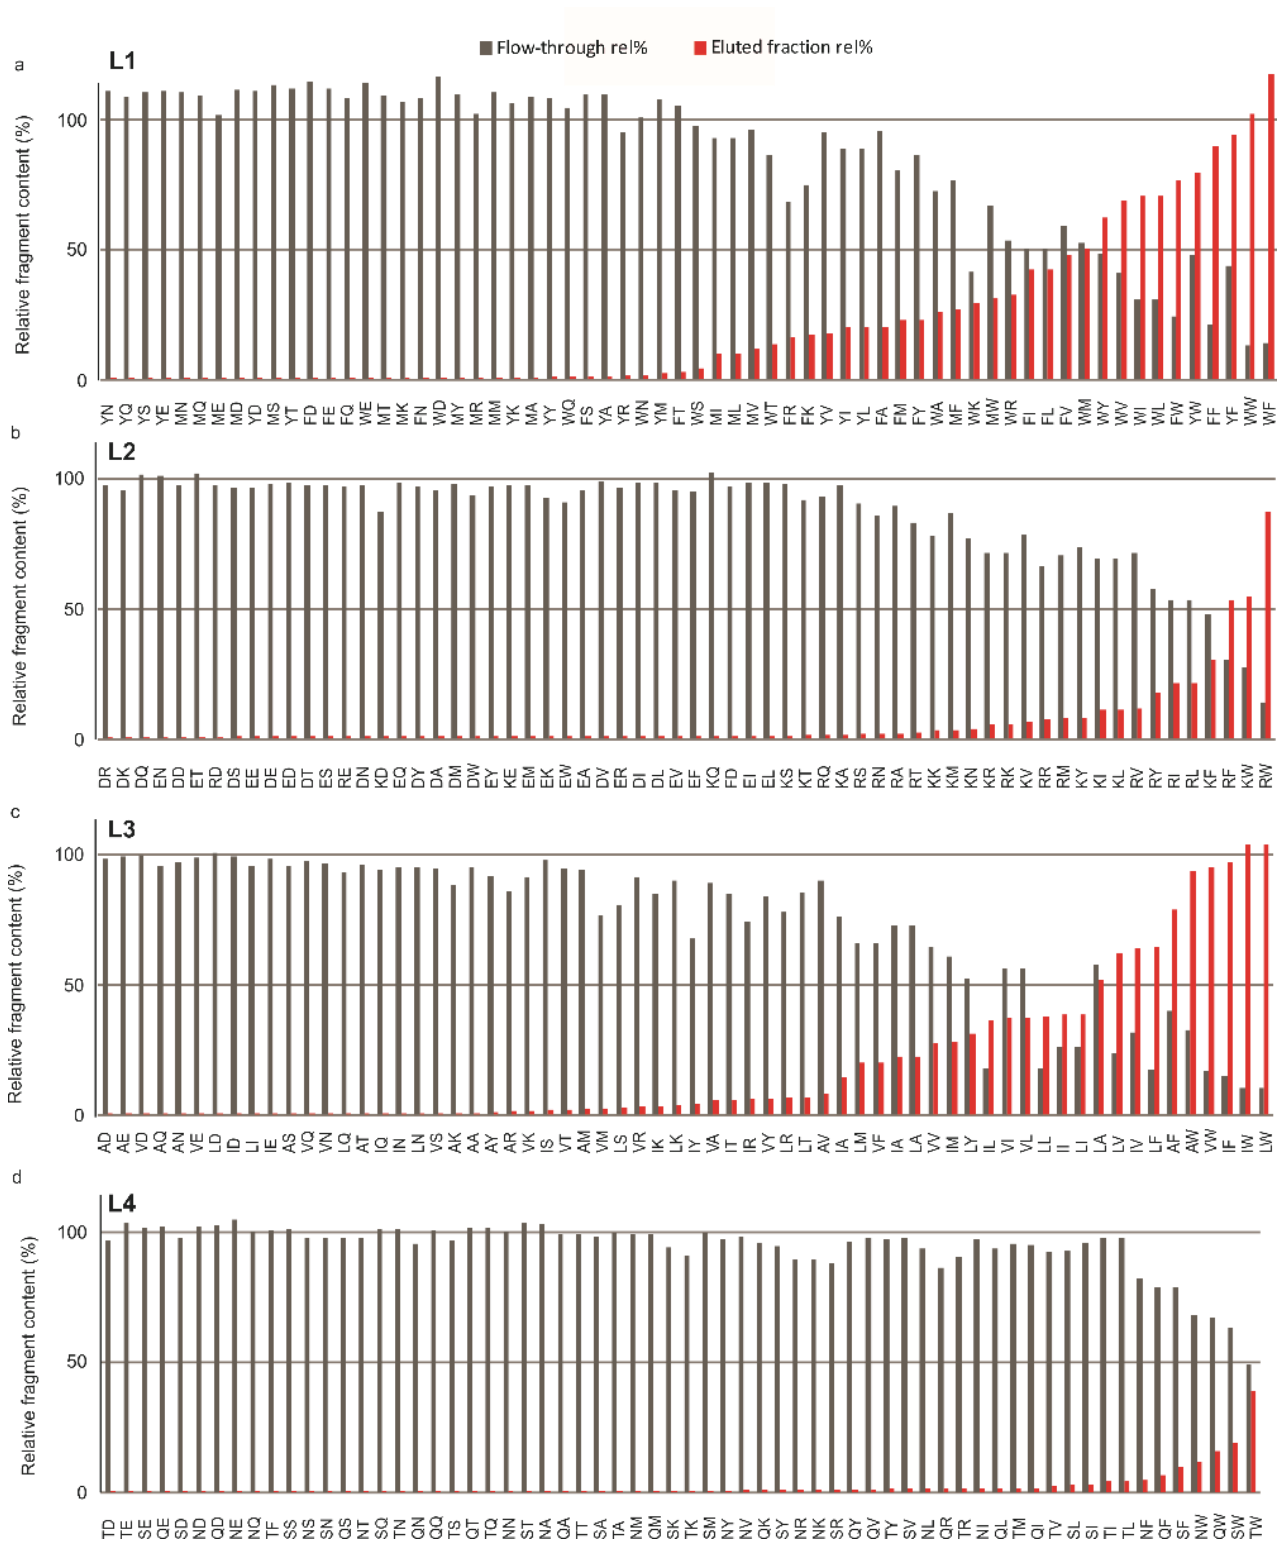

**Figure S2. Results of the pulldown assay.**

Relative content of the fragments was calculated on the basis of HPLC-MS peak integration using the following formula:  $AUC_{\text{fragment}}/AUC_{\text{control}} * 100$  in the flow-through (grey bars) and in the eluted samples (red bars) for **a** L1, **b** L2, **c** L3 and **d** L4 sub-libraries. AUC determination



for overlapping peaks were according to Table S1-4. Single letter amino acid codes are corresponding to the homologous  $\beta^3$ -amino acid used in position 2 and 5 of the foldamers.

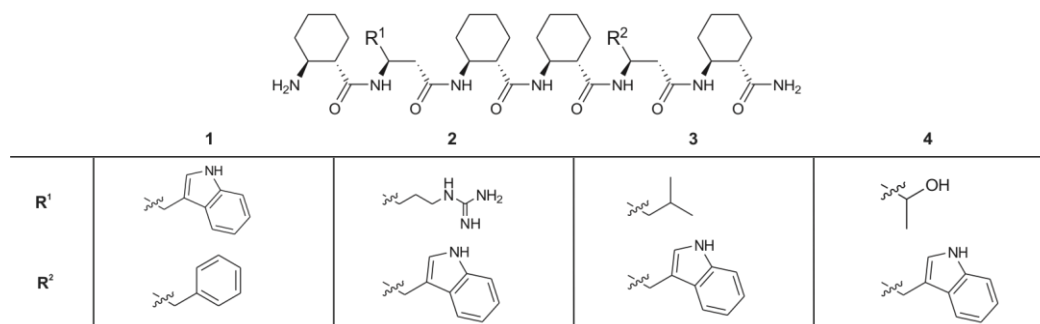

**Figure S3. Chemical structure of the selected foldameric recognition segment candidates (1-4).** Side-chains in positions 2 ( $R^1$ ) and 5 ( $R^2$ ) are indicated.

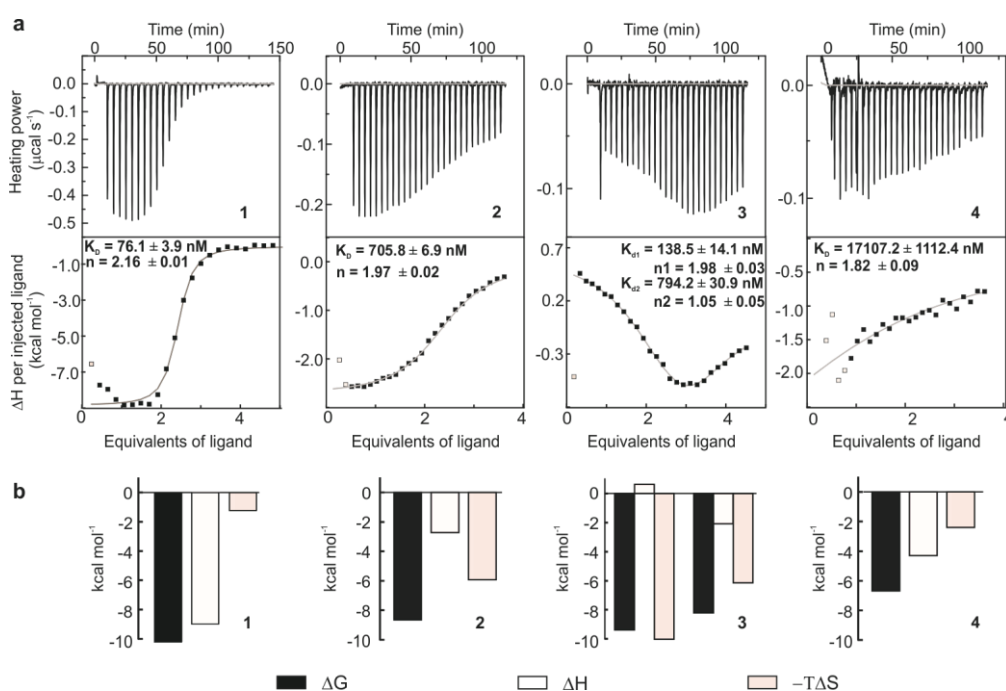

**Figure S4. ITC titration data for 1-4.** a) ITC titration raw data (upper) and integrated enthalpograms with fitted curves and parameters (lower). b) Thermodynamic parameters derived from the ITC titration curves for folded fragments 1-4.

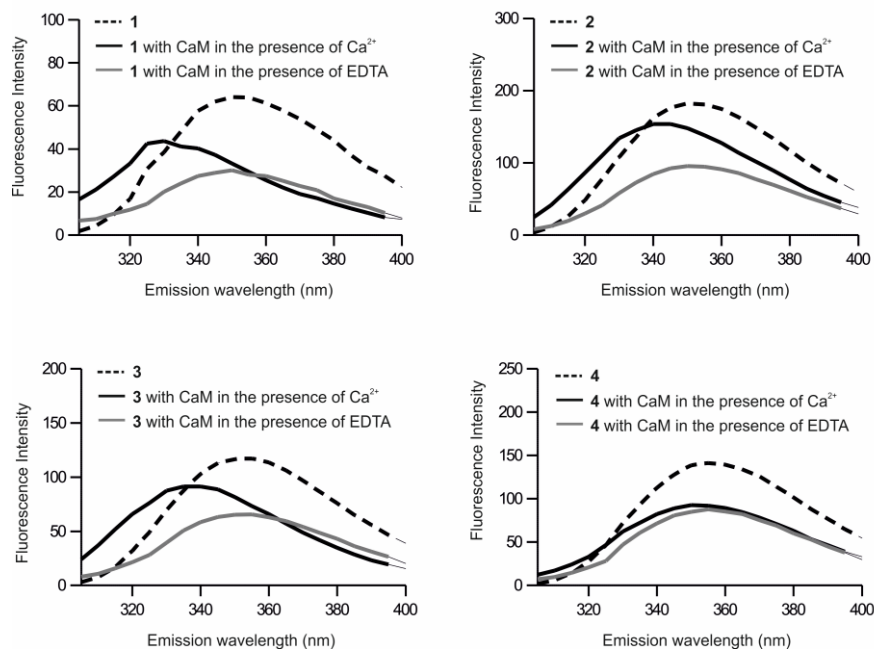

**Figure S5. Fluorescence blue-shift measurements.**

Fluorescence emission spectra in the range 300-400 nm for the fragments in 0.2  $\mu\text{M}$  concentration (dashed line), in the presence of 0.2  $\mu\text{M}$  CaM and 1 mM  $\text{CaCl}_2$  (solid, black line) or 5 mM EDTA (solid grey line). The emission maximum corresponding to the  $\beta^3$ -hTrp residue exhibited a blue shift upon addition of CaM only in the presence of  $\text{Ca}^{2+}$ , which indicated  $\text{Ca}^{2+}$ -dependent interaction between the fragments and CaM.

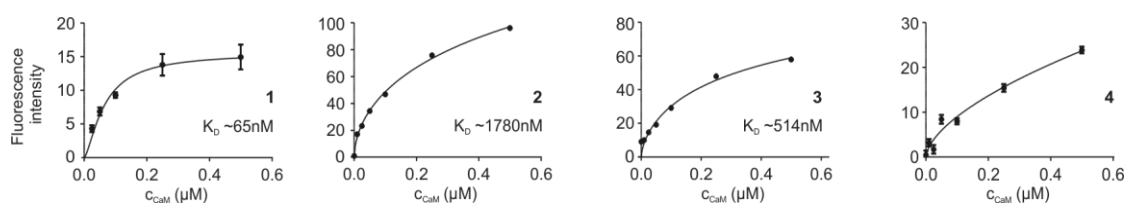

**Figure S6. Estimated  $K_D$  values from Trp fluorescence measurements.**

Observed and fitted titration curves for the Trp fluorescence blue-shifts and the estimated  $K_D$  values. Fluorescence intensity was monitored at 330 nm.

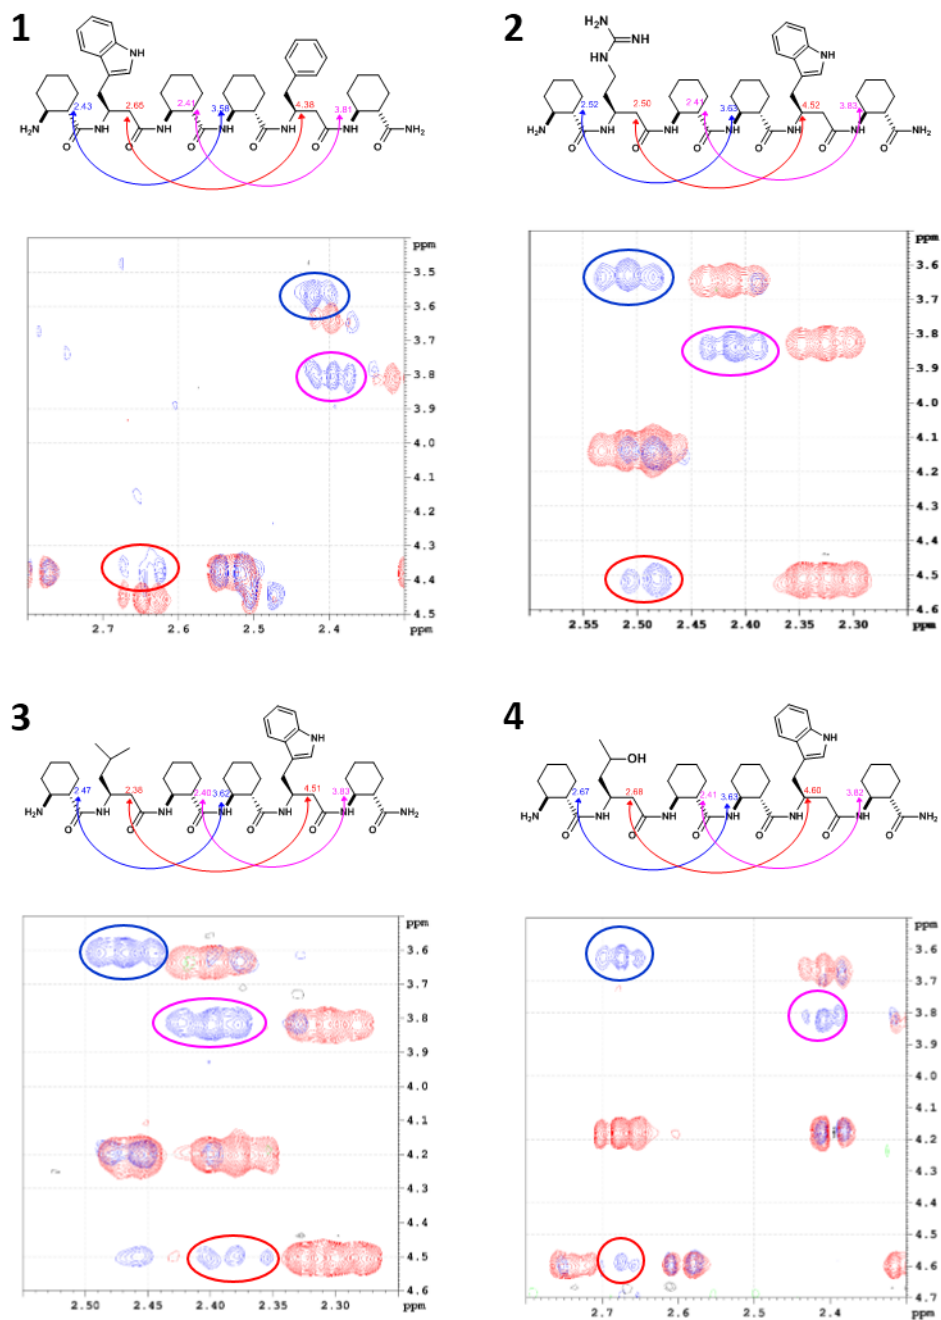

**Figure S7. ROESY spectra for 1-4**

NOE interactions showing the helicity of compounds **1-4**. Overlaid TOCSY (red) and ROESY (blue) spectra for compounds **1-4** in the absence of the protein. Colour-coded chemical shift assignment and detected  $i - i+3$  type long-range interactions, characteristic for the H14 helix, are indicated on the structures. Peptides were dissolved in 20 mM pH 7.0  $d_{18}$ -HEPES, at a concentration of 90-500  $\mu$ M. NMR experiments were performed at 25  $^{\circ}$ C.

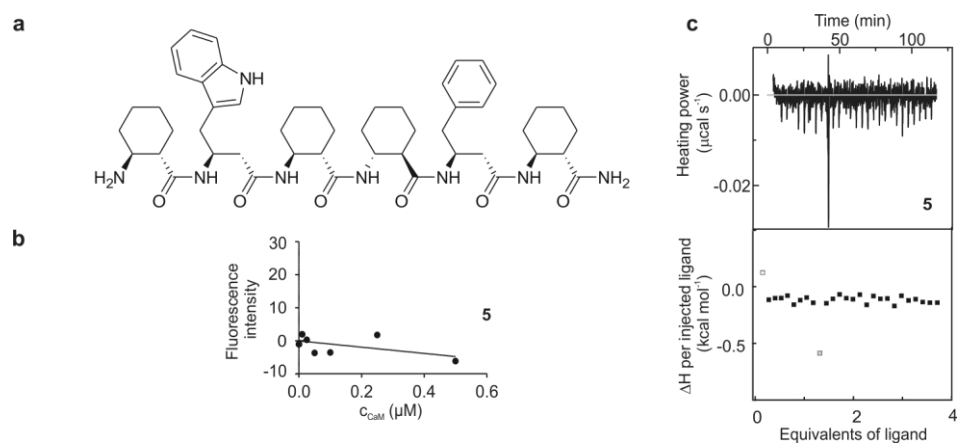

**Figure S8. Structure and binding data for the non-helical control peptide**

a) Structure of the non-helical control derivative (**5**). b) Result of the fluorescence titration experiment c) ITC titration raw data (upper) and integrated enthalpogram (lower).

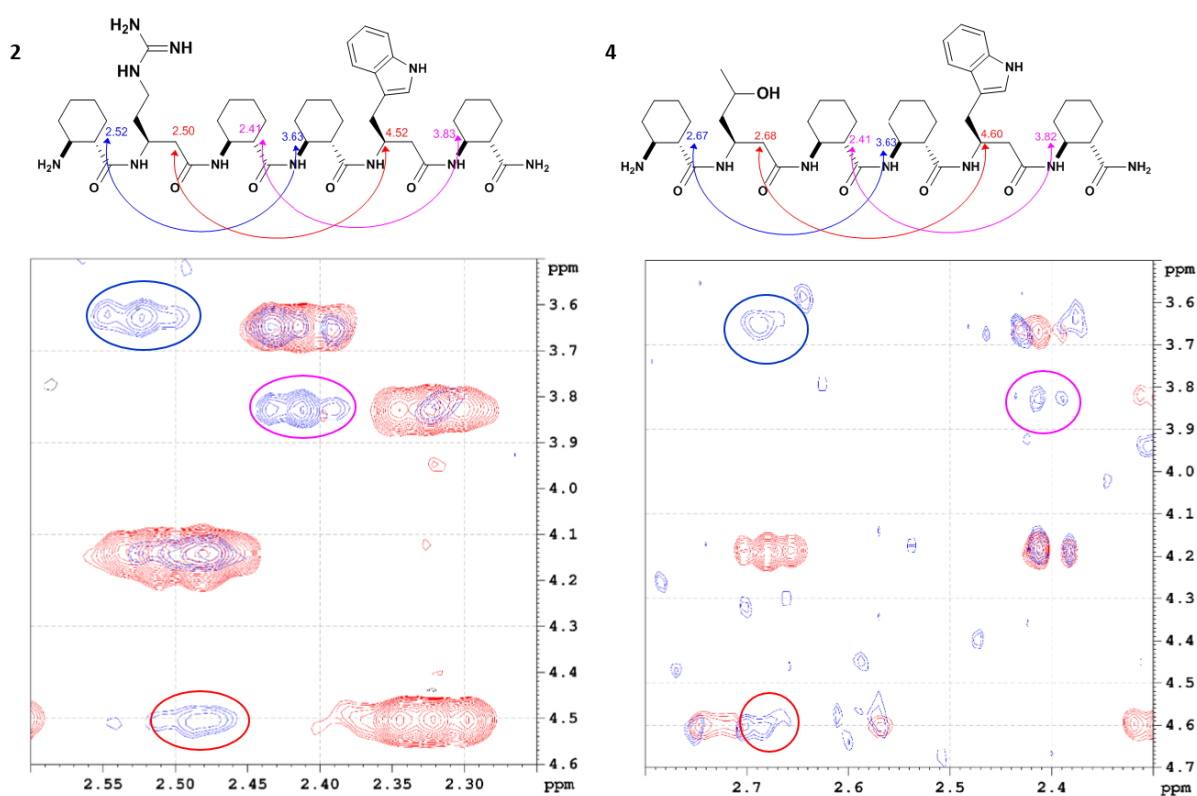

**Figure S9. trNOE spectra for 2 and 4**

Transferred NOE interactions showing the helicity of the CaM-bound compounds **2** and **4**; overlaid TOCSY (red) and NOESY spectra acquired with a mixing time of 150 ms (blue). While free ligands have short correlation times and slow NOE build-up (400-800 ms), protein-sized systems and bound ligands have long correlation times and NOE builds up rapidly (50-150 ms). The cross-peaks in the 2D NOESY spectra acquired with a mixing time of 150 ms represents the structure of the bound peptides (transferred NOE), which appeared to be a H14 helix. Spectra were acquired under the same conditions as described above but CaM was added to the sample (ca. 50 x ligand excess was applied).

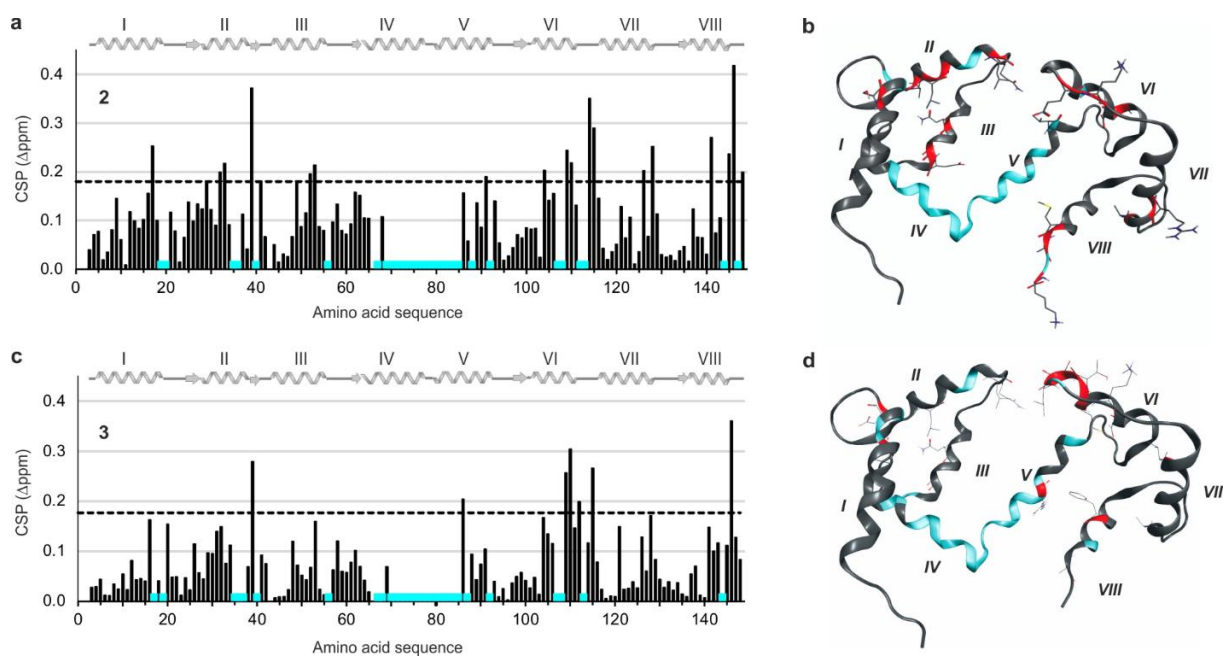

**Figure S10. NMR CSP determination upon ligand binding.** **a** Chemical shift perturbations (CSP) of CaM in the presence of 3 equivalents of **2**. **b** Residues with CSPs above the threshold (red) and the highest resonance broadening (cyan) mapped to the ribbon representation of CaM (PDB code: 2K0E<sup>2</sup>). **c** CSPs of CaM in the presence of 3 equivalents of **3**. **d** Residues with CSPs above the threshold (red) and the highest resonance broadening (cyan) mapped to the ribbon representation of CaM. Residues with extreme resonance broadening (completely disappeared) are marked with a cyan line. The CaM secondary structure is indicated above the diagrams. The CSP values were calculated using the formula  $[(\Delta\delta(^1\text{H}))^2 + 0.14*(\Delta\delta(^{15}\text{N}))^2]^{1/2}$ . A broken line indicates the mean+standard deviation of the CSP values for the individual titrations, which are used as a threshold.

**Table S5. Characterization data of the members of DCL**

| DCL members |            | Calculated |                                 |                                    |                                    |                                    | Detected peaks |                                    |
|-------------|------------|------------|---------------------------------|------------------------------------|------------------------------------|------------------------------------|----------------|------------------------------------|
| monomer I   | monomer II | MW         | [MH <sup>+</sup> ] <sup>+</sup> | [M+2H <sup>+</sup> ] <sup>2+</sup> | [M+3H <sup>+</sup> ] <sup>3+</sup> | [M+4H <sup>+</sup> ] <sup>4+</sup> | Rt(min)        | Detected ion                       |
| 6           | 11         | 2160.75    | 2161.75                         | 1081.38                            | 721.25                             | 541.19                             | 13.64          | [M+3H <sup>+</sup> ] <sup>3+</sup> |
| 6           | 10         | 2171.77    | 2172.77                         | 1086.89                            | 724.92                             | 543.94                             | 13.69          | [M+3H <sup>+</sup> ] <sup>3+</sup> |
| 6           | 9          | 2199.79    | 2200.79                         | 1100.9                             | 734.26                             | 550.95                             | 13.74          | [M+3H <sup>+</sup> ] <sup>3+</sup> |
| 6           | GSH        | 1400.48    | 1401.48                         | 701.24                             | 467.83                             | 351.12                             | 13.96          | [M+2H <sup>+</sup> ] <sup>2+</sup> |
| 6           | 16         | 2171.73    | 2172.73                         | 1086.87                            | 724.91                             | 543.93                             | 15.01          | [M+2H <sup>+</sup> ] <sup>2+</sup> |
| 6           | 15         | 2130.68    | 2131.68                         | 1066.34                            | 711.23                             | 533.67                             | 15.11          | [M+2H <sup>+</sup> ] <sup>2+</sup> |
| 6           | 17         | 2144.71    | 2145.71                         | 1073.36                            | 715.9                              | 537.18                             | 15.41          | [M+2H <sup>+</sup> ] <sup>2+</sup> |
| 6           | -          | 1096.39    | 1097.39                         | 549.2                              | 366.46                             | 275.1                              | 15.51          | [MH <sup>+</sup> ] <sup>1+</sup>   |
| 6           | 8          | 2167.74    | 2168.74                         | 1084.87                            | 723.58                             | 542.94                             | 15.73          | [M+2H <sup>+</sup> ] <sup>2+</sup> |
| 6           | 7          | 2229.81    | 2230.81                         | 1115.91                            | 744.27                             | 558.45                             | 16.5           | [M+2H <sup>+</sup> ] <sup>2+</sup> |
| 6           | 6          | 2190.78    | 2191.78                         | 1096.39                            | 731.26                             | 548.7                              | 16.58          | [M+2H <sup>+</sup> ] <sup>2+</sup> |
| 6           | 13         | 2142.73    | 2143.73                         | 1072.37                            | 715.24                             | 536.68                             | 16.6           | [M+2H <sup>+</sup> ] <sup>2+</sup> |
| 6           | 14         | 2117.72    | 2118.72                         | 1059.86                            | 706.91                             | 530.43                             | 17             | [M+2H <sup>+</sup> ] <sup>2+</sup> |
| 6           | 12         | 2156.76    | 2157.76                         | 1079.38                            | 719.92                             | 540.19                             | 17.06          | [M+2H <sup>+</sup> ] <sup>2+</sup> |
| 7           | 11         | 2199.78    | 2200.78                         | 1100.89                            | 734.26                             | 550.95                             | 13.62          | [M+3H <sup>+</sup> ] <sup>3+</sup> |
| 7           | 10         | 2210.8     | 2211.8                          | 1106.4                             | 737.93                             | 553.7                              | 13.64          | [M+3H <sup>+</sup> ] <sup>3+</sup> |
| 7           | 9          | 2238.82    | 2239.82                         | 1120.41                            | 747.27                             | 560.71                             | 13.77          | [M+3H <sup>+</sup> ] <sup>3+</sup> |
| 7           | GSH        | 1439.51    | 1440.51                         | 720.76                             | 480.84                             | 360.88                             | 13.9           | [M+2H <sup>+</sup> ] <sup>2+</sup> |
| 7           | 16         | 2210.76    | 2211.76                         | 1106.38                            | 737.92                             | 553.69                             | 14.95          | [M+2H <sup>+</sup> ] <sup>2+</sup> |
| 7           | 15         | 2169.71    | 2170.71                         | 1085.86                            | 724.24                             | 543.43                             | 15.05          | [M+2H <sup>+</sup> ] <sup>2+</sup> |
| 7           | -          | 1135.42    | 1136.42                         | 568.71                             | 379.47                             | 284.86                             | 15.35          | [MH <sup>+</sup> ] <sup>1+</sup>   |
| 7           | 17         | 2183.74    | 2184.74                         | 1092.87                            | 728.91                             | 546.94                             | 15.35          | [M+2H <sup>+</sup> ] <sup>2+</sup> |
| 7           | 8          | 2206.77    | 2207.77                         | 1104.39                            | 736.59                             | 552.69                             | 15.68          | [M+2H <sup>+</sup> ] <sup>2+</sup> |
| 7           | 7          | 2268.84    | 2269.84                         | 1135.42                            | 757.28                             | 568.21                             | 16.49          | [M+2H <sup>+</sup> ] <sup>2+</sup> |
| 7           | 13         | 2181.76    | 2182.76                         | 1091.88                            | 728.25                             | 546.44                             | 16.52          | [M+2H <sup>+</sup> ] <sup>2+</sup> |
| 7           | 14         | 2156.75    | 2157.75                         | 1079.38                            | 719.92                             | 540.19                             | 16.93          | [M+2H <sup>+</sup> ] <sup>2+</sup> |
| 7           | 12         | 2195.79    | 2196.79                         | 1098.9                             | 732.93                             | 549.95                             | 17.01          | [M+2H <sup>+</sup> ] <sup>2+</sup> |
| 8           | GSH        | 1377.44    | 1378.44                         | 689.72                             | 460.15                             | 345.36                             | 12.64          | [M+3H <sup>+</sup> ] <sup>3+</sup> |
| 8           | 11         | 2137.71    | 2138.71                         | 1069.86                            | 713.57                             | 535.43                             | 12.87          | [M+3H <sup>+</sup> ] <sup>3+</sup> |
| 8           | 10         | 2148.73    | 2149.73                         | 1075.37                            | 717.24                             | 538.18                             | 12.92          | [M+3H <sup>+</sup> ] <sup>3+</sup> |
| 8           | 9          | 2176.75    | 2177.75                         | 1089.38                            | 726.58                             | 545.19                             | 12.98          | [M+3H <sup>+</sup> ] <sup>3+</sup> |
| 8           | -          | 1073.35    | 1074.35                         | 537.68                             | 358.78                             | 269.34                             | 14.05          | [MH <sup>+</sup> ] <sup>1+</sup>   |
| 8           | 16         | 2148.69    | 2149.69                         | 1075.35                            | 717.23                             | 538.17                             | 14.1           | [M+3H <sup>+</sup> ] <sup>3+</sup> |
| 8           | 15         | 2107.64    | 2108.64                         | 1054.82                            | 703.55                             | 527.91                             | 14.21          | [M+2H <sup>+</sup> ] <sup>2+</sup> |
| 8           | 17         | 2121.67    | 2122.67                         | 1061.84                            | 708.22                             | 531.42                             | 14.5           | [M+2H <sup>+</sup> ] <sup>2+</sup> |
| 8           | 8          | 2144.7     | 2145.7                          | 1073.35                            | 715.9                              | 537.18                             | 14.88          | [M+2H <sup>+</sup> ] <sup>2+</sup> |
| 8           | 13         | 2119.69    | 2120.69                         | 1060.85                            | 707.56                             | 530.92                             | 15.75          | [M+2H <sup>+</sup> ] <sup>2+</sup> |
| 8           | 14         | 2094.68    | 2095.68                         | 1048.34                            | 699.23                             | 524.67                             | 16.14          | [M+2H <sup>+</sup> ] <sup>2+</sup> |
| 8           | 12         | 2133.72    | 2134.72                         | 1067.86                            | 712.24                             | 534.43                             | 16.22          | [M+2H <sup>+</sup> ] <sup>2+</sup> |
| 9           | GSH        | 1409.49    | 1410.49                         | 705.75                             | 470.83                             | 353.37                             | 9.97           | [M+2H <sup>+</sup> ] <sup>2+</sup> |
| 9           | -          | 1105.4     | 1106.4                          | 553.7                              | 369.47                             | 277.35                             | 10.75          | [M+2H <sup>+</sup> ] <sup>2+</sup> |
| 9           | 11         | 2169.76    | 2170.76                         | 1085.88                            | 724.25                             | 543.44                             | 11.3           | [M+4H <sup>+</sup> ] <sup>4+</sup> |
| 9           | 10         | 2180.78    | 2181.78                         | 1091.39                            | 727.93                             | 546.2                              | 11.33          | [M+4H <sup>+</sup> ] <sup>4+</sup> |
| 9           | 9          | 2208.8     | 2209.8                          | 1105.4                             | 737.27                             | 553.2                              | 11.42          | [M+4H <sup>+</sup> ] <sup>4+</sup> |
| 9           | 16         | 2180.74    | 2181.74                         | 1091.37                            | 727.91                             | 546.19                             | 12.22          | [M+3H <sup>+</sup> ] <sup>3+</sup> |
| 9           | 15         | 2139.69    | 2140.69                         | 1070.85                            | 714.23                             | 535.92                             | 12.26          | [M+3H <sup>+</sup> ] <sup>3+</sup> |
| 9           | 17         | 2153.72    | 2154.72                         | 1077.86                            | 718.91                             | 539.43                             | 12.55          | [M+3H <sup>+</sup> ] <sup>3+</sup> |
| 9           | 13         | 2151.74    | 2152.74                         | 1076.87                            | 718.25                             | 538.94                             | 13.71          | [M+3H <sup>+</sup> ] <sup>3+</sup> |
| 9           | 14         | 2126.73    | 2127.73                         | 1064.37                            | 709.91                             | 532.68                             | 14.09          | [M+3H <sup>+</sup> ] <sup>3+</sup> |
| 9           | 12         | 2165.77    | 2166.77                         | 1083.89                            | 722.92                             | 542.44                             | 14.19          | [M+3H <sup>+</sup> ] <sup>3+</sup> |

|    |     |         |         |         |        |        |       |                                    |
|----|-----|---------|---------|---------|--------|--------|-------|------------------------------------|
| 10 | GSH | 1381.47 | 1382.47 | 691.74  | 461.49 | 346.37 | 9.9   | [M+2H <sup>+</sup> ] <sup>2+</sup> |
| 10 | -   | 1077.38 | 1078.38 | 539.69  | 360.13 | 270.35 | 10.65 | [M+2H <sup>+</sup> ] <sup>2+</sup> |
| 10 | 11  | 2141.74 | 2142.74 | 1071.87 | 714.91 | 536.44 | 11.23 | [M+4H <sup>+</sup> ] <sup>4+</sup> |
| 10 | 10  | 2152.76 | 2153.76 | 1077.38 | 718.59 | 539.19 | 11.3  | [M+4H <sup>+</sup> ] <sup>4+</sup> |
| 10 | 16  | 2152.72 | 2153.72 | 1077.36 | 718.57 | 539.18 | 12.12 | [M+3H <sup>+</sup> ] <sup>3+</sup> |
| 10 | 15  | 2111.63 | 2112.63 | 1056.82 | 704.88 | 528.91 | 12.17 | [M+3H <sup>+</sup> ] <sup>3+</sup> |
| 10 | 17  | 2125.7  | 2126.7  | 1063.85 | 709.57 | 532.43 | 12.49 | [M+3H <sup>+</sup> ] <sup>3+</sup> |
| 10 | 14  | 2098.71 | 2099.71 | 1050.36 | 700.57 | 525.68 | 14.02 | [M+3H <sup>+</sup> ] <sup>3+</sup> |
| 10 | 13  | 2123.68 | 2124.68 | 1062.84 | 708.89 | 531.92 | 14.07 | [M+3H <sup>+</sup> ] <sup>3+</sup> |
| 10 | 12  | 2137.75 | 2138.75 | 1069.88 | 713.58 | 535.44 | 14.12 | [M+3H <sup>+</sup> ] <sup>3+</sup> |
| 11 | GSH | 1370.45 | 1371.45 | 686.23  | 457.82 | 343.61 | 9.79  | [M+2H <sup>+</sup> ] <sup>2+</sup> |
| 11 | -   | 1066.36 | 1067.36 | 534.18  | 356.45 | 267.59 | 10.58 | [M+2H <sup>+</sup> ] <sup>2+</sup> |
| 11 | 11  | 2130.72 | 2131.72 | 1066.36 | 711.24 | 533.68 | 11.19 | [M+4H <sup>+</sup> ] <sup>4+</sup> |
| 11 | 16  | 2141.7  | 2142.7  | 1071.85 | 714.9  | 536.43 | 12.09 | [M+3H <sup>+</sup> ] <sup>3+</sup> |
| 11 | 15  | 2100.65 | 2101.65 | 1051.33 | 701.22 | 526.16 | 12.15 | [M+3H <sup>+</sup> ] <sup>3+</sup> |
| 11 | 17  | 2114.68 | 2115.68 | 1058.34 | 705.89 | 529.67 | 12.47 | [M+3H <sup>+</sup> ] <sup>3+</sup> |
| 11 | 13  | 2112.7  | 2113.7  | 1057.35 | 705.23 | 529.18 | 13.62 | [M+3H <sup>+</sup> ] <sup>3+</sup> |
| 11 | 14  | 2087.69 | 2088.69 | 1044.85 | 696.9  | 522.92 | 14.02 | [M+3H <sup>+</sup> ] <sup>3+</sup> |
| 11 | 12  | 2126.73 | 2127.73 | 1064.37 | 709.91 | 532.68 | 14.1  | [M+3H <sup>+</sup> ] <sup>3+</sup> |
| 12 | GSH | 1366.46 | 1367.46 | 684.23  | 456.49 | 342.62 | 14.6  | [M+2H <sup>+</sup> ] <sup>2+</sup> |
| 12 | 16  | 2137.71 | 2138.71 | 1069.86 | 713.57 | 535.43 | 15.48 | [M+2H <sup>+</sup> ] <sup>2+</sup> |
| 12 | 15  | 2096.66 | 2097.66 | 1049.33 | 699.89 | 525.17 | 15.61 | [M+2H <sup>+</sup> ] <sup>2+</sup> |
| 12 | 17  | 2111.67 | 2112.67 | 1056.84 | 704.89 | 528.92 | 15.89 | [M+2H <sup>+</sup> ] <sup>2+</sup> |
| 12 | -   | 1062.37 | 1063.37 | 532.19  | 355.12 | 266.59 | 16.18 | [MH <sup>+</sup> ] <sup>1+</sup>   |
| 12 | 13  | 2108.71 | 2109.71 | 1055.36 | 703.9  | 528.18 | 17.12 | [M+2H <sup>+</sup> ] <sup>2+</sup> |
| 12 | 14  | 2084.61 | 2085.61 | 1043.31 | 695.87 | 522.15 | 17.53 | [M+2H <sup>+</sup> ] <sup>2+</sup> |
| 12 | 12  | 2123.72 | 2124.72 | 1062.86 | 708.91 | 531.93 | 17.59 | [M+2H <sup>+</sup> ] <sup>2+</sup> |
| 13 | GSH | 1352.43 | 1353.43 | 677.22  | 451.81 | 339.11 | 13.81 | [M+2H <sup>+</sup> ] <sup>2+</sup> |
| 13 | 16  | 2122.74 | 2123.74 | 1062.37 | 708.58 | 531.69 | 14.97 | [M+2H <sup>+</sup> ] <sup>2+</sup> |
| 13 | 15  | 2082.63 | 2083.63 | 1042.32 | 695.21 | 521.66 | 15.1  | [M+2H <sup>+</sup> ] <sup>2+</sup> |
| 13 | -   | 1048.34 | 1049.34 | 525.17  | 350.45 | 263.09 | 15.36 | [MH <sup>+</sup> ] <sup>1+</sup>   |
| 13 | 17  | 2096.66 | 2097.66 | 1049.33 | 699.89 | 525.17 | 15.37 | [M+3H <sup>+</sup> ] <sup>3+</sup> |
| 13 | 13  | 2094.68 | 2095.68 | 1048.34 | 699.23 | 524.67 | 16.61 | [M+2H <sup>+</sup> ] <sup>2+</sup> |
| 14 | GSH | 1327.42 | 1328.42 | 664.71  | 443.47 | 332.86 | 14.4  | [M+2H <sup>+</sup> ] <sup>2+</sup> |
| 14 | 16  | 2098.67 | 2099.67 | 1050.34 | 700.56 | 525.67 | 15.4  | [M+2H <sup>+</sup> ] <sup>2+</sup> |
| 14 | 15  | 2057.62 | 2058.62 | 1029.81 | 686.87 | 515.41 | 15.5  | [M+2H <sup>+</sup> ] <sup>2+</sup> |
| 14 | 17  | 2071.65 | 2072.65 | 1036.83 | 691.55 | 518.91 | 15.78 | [M+2H <sup>+</sup> ] <sup>2+</sup> |
| 14 | -   | 1023.33 | 1024.33 | 512.67  | 342.11 | 256.83 | 16.14 | [MH <sup>+</sup> ] <sup>1+</sup>   |
| 14 | 13  | 2069.67 | 2070.67 | 1035.84 | 690.89 | 518.42 | 17.04 | [M+2H <sup>+</sup> ] <sup>2+</sup> |
| 14 | 14  | 2044.66 | 2045.66 | 1023.33 | 682.55 | 512.17 | 17.5  | [M+2H <sup>+</sup> ] <sup>2+</sup> |
| 15 | GSH | 1340.38 | 1341.38 | 671.19  | 447.79 | 336.1  | 11.21 | [M+2H <sup>+</sup> ] <sup>2+</sup> |
| 15 | -   | 1036.29 | 1037.29 | 519.15  | 346.43 | 260.07 | 12.47 | [MH <sup>+</sup> ] <sup>1+</sup>   |
| 15 | 16  | 2110.69 | 2111.69 | 1056.35 | 704.56 | 528.67 | 13.34 | [M+2H <sup>+</sup> ] <sup>2+</sup> |
| 15 | 15  | 2070.58 | 2071.58 | 1036.29 | 691.19 | 518.65 | 13.43 | [M+2H <sup>+</sup> ] <sup>2+</sup> |
| 16 | GSH | 1381.43 | 1382.43 | 691.72  | 461.48 | 346.36 | 11.19 | [M+2H <sup>+</sup> ] <sup>2+</sup> |
| 16 | -   | 1077.34 | 1078.34 | 539.67  | 360.11 | 270.34 | 12.36 | [MH <sup>+</sup> ] <sup>1+</sup>   |
| 16 | 16  | 2152.68 | 2153.68 | 1077.34 | 718.56 | 539.17 | 13.24 | [M+2H <sup>+</sup> ] <sup>2+</sup> |
| 17 | GSH | 1354.41 | 1355.41 | 678.21  | 452.47 | 339.6  | 11.71 | [M+2H <sup>+</sup> ] <sup>2+</sup> |
| 17 | -   | 1050.32 | 1051.32 | 526.16  | 351.11 | 263.58 | 13.04 | [MH <sup>+</sup> ] <sup>1+</sup>   |
| 17 | 16  | 2125.66 | 2126.66 | 1063.83 | 709.55 | 532.42 | 13.68 | [M+2H <sup>+</sup> ] <sup>2+</sup> |
| 17 | 15  | 2083.7  | 2084.7  | 1042.85 | 695.57 | 521.93 | 13.75 | [M+3H <sup>+</sup> ] <sup>3+</sup> |
| 17 | 17  | 2098.64 | 2099.64 | 1050.32 | 700.55 | 525.66 | 14.04 | [M+3H <sup>+</sup> ] <sup>3+</sup> |



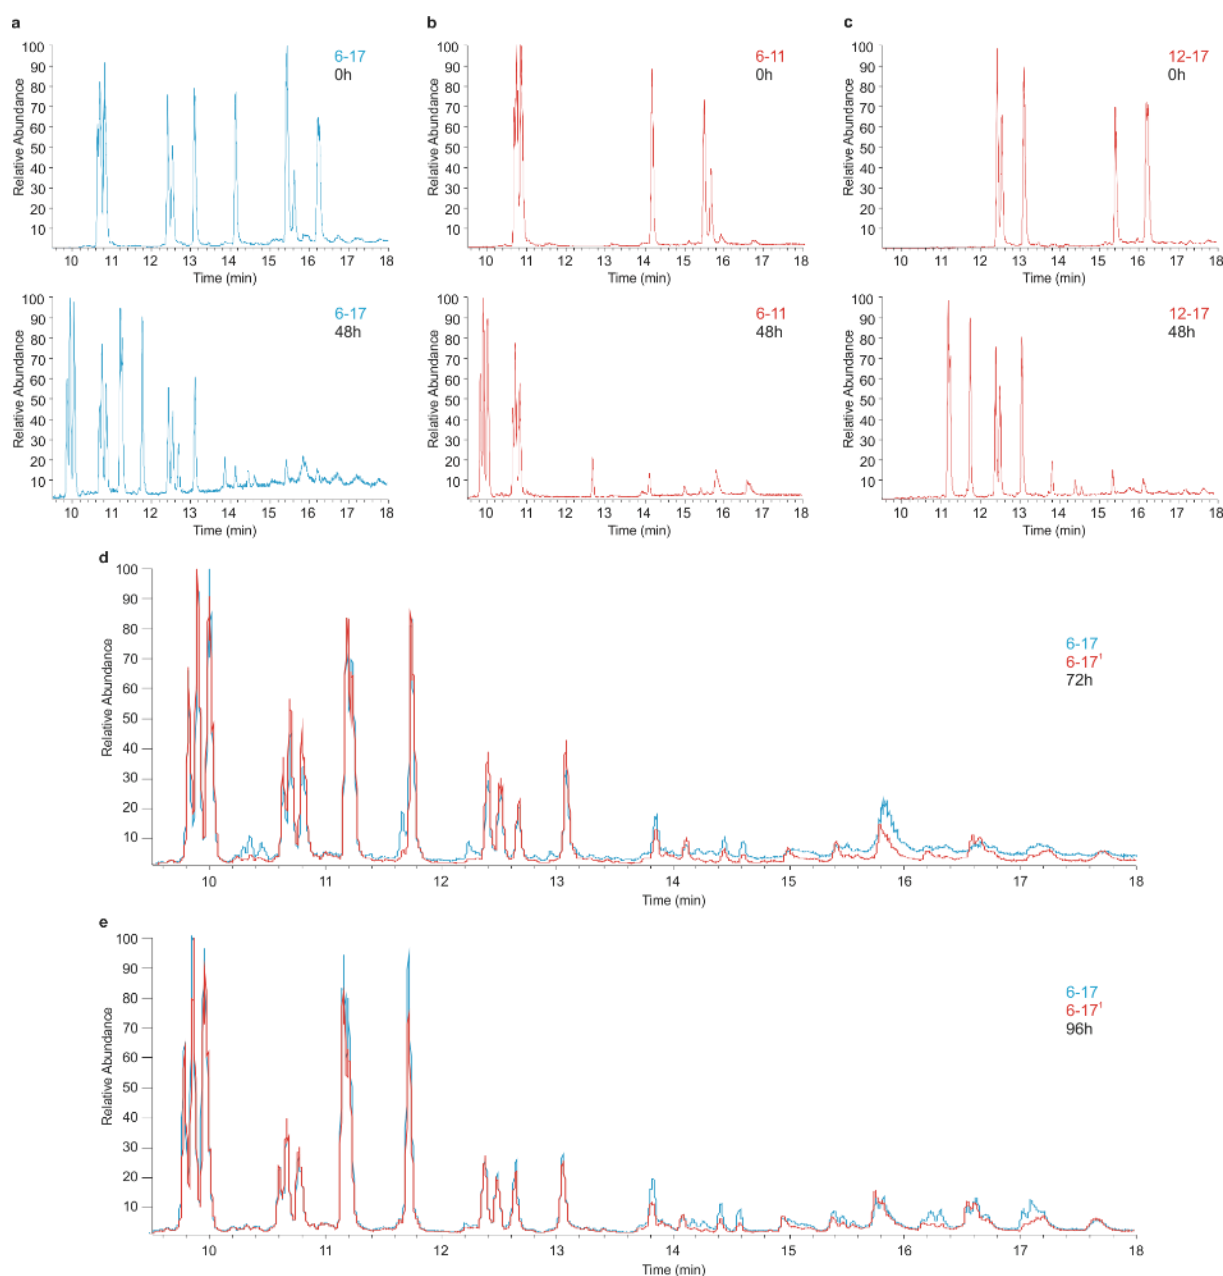

**Figure S11. Assessing thermodynamic equilibrium.** Partial MS-detected HPLC chromatograms for DCLs of different mixture compositions at 0 h and pre-equilibrated at 48 h: library containing **6-17** at 10  $\mu\text{M}$  for each members (**a**), **6-11** at 20  $\mu\text{M}$  for each members (**b**) and **12-17** at 20  $\mu\text{M}$  for each members (**c**). The pre-equilibrated mixtures **b** and **c** were pooled and the product composition was analyzed after 72 h (**d**) and 96 h (**e**). The HPLC results obtained for the pre-equilibrated library are given with red curves, and the analysis for the control library is given in blue. After 96 h, only slight differences could be detected between pre-equilibrated and pooled sample (red) and the control sample (blue). This showed that thermodynamic equilibrium has been reached after 96 h independently of the starting conditions.

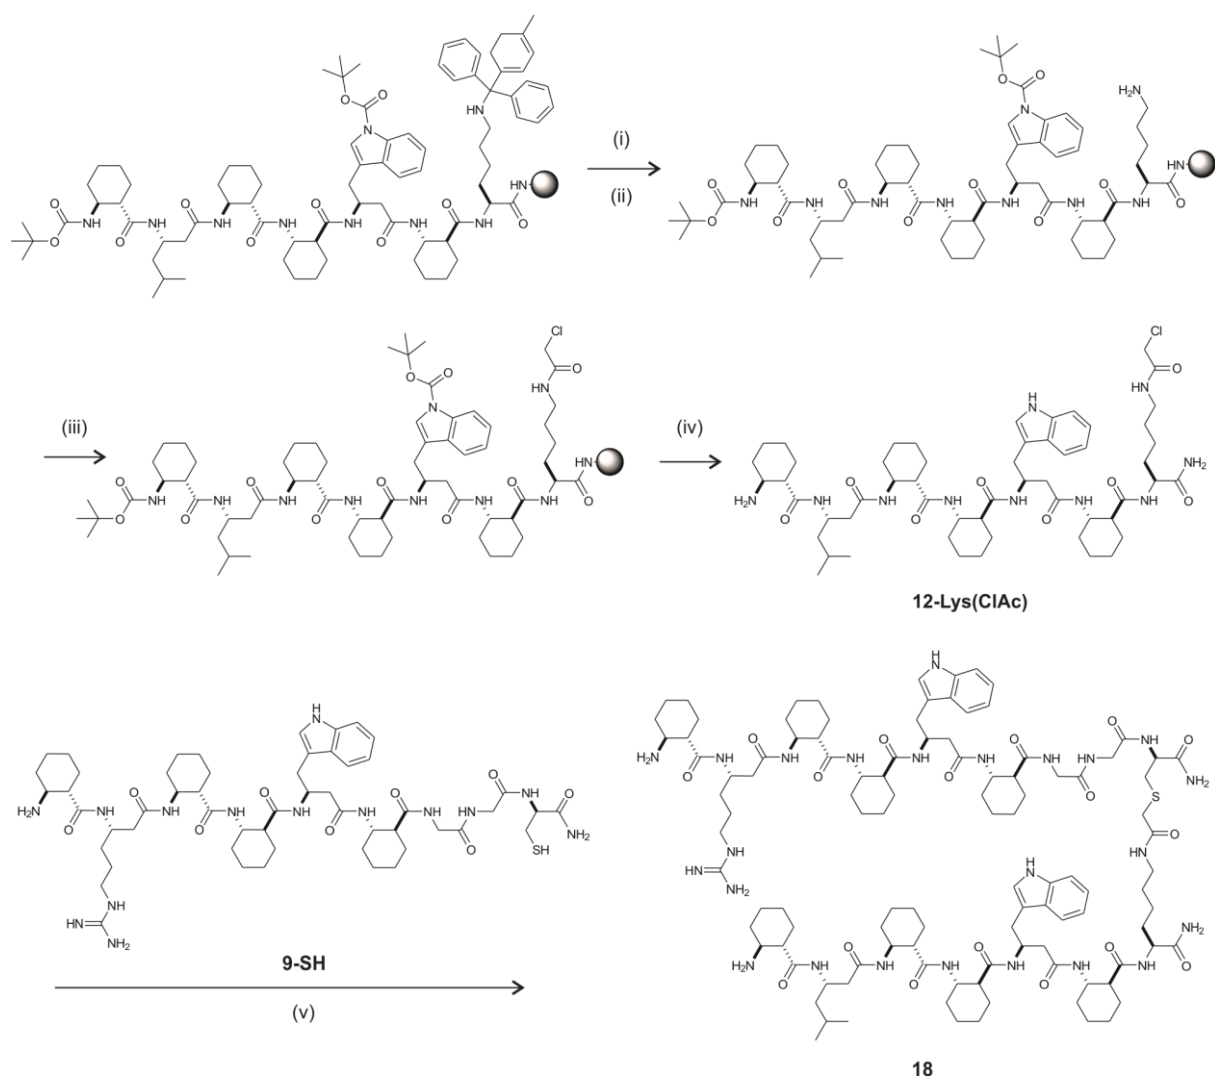

**Figure S12. Synthesis of 18.** Reaction condition: (i) AcOH/TFE/DCM (2:1:7); (ii) 5% DIEA in DMF, 30 min, RT; (iii) chloroacetic acid/DCC/HOAt, 3 h, RT; (iv) TFA/H<sub>2</sub>O/TIS (92:5:3), 3 h, RT; (v) 0.1 M Tris buffer (pH=8.2), overnight, RT.

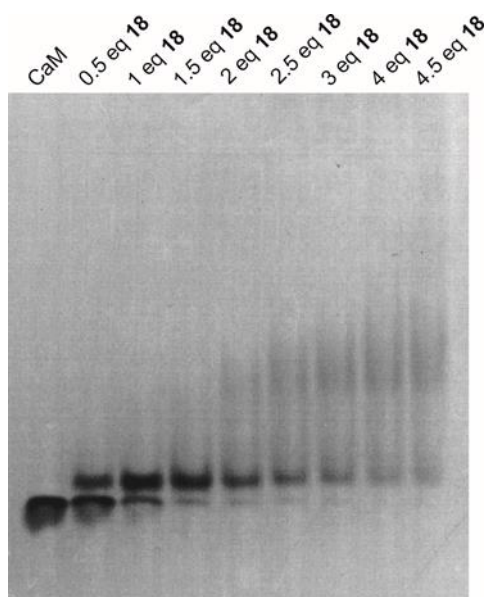

**Figure S13. Native gel electrophoresis** of CaM after addition of different amount of **18**. CaM concentration was 100  $\mu\text{M}$  in pH 7.0, 20 mM HEPES buffer containing 30 mM  $\text{CaCl}_2$  and 10 % DMSO. Foldamer equivalents are indicated on the top., The two bands appear assigned to pure CaM and the stoichiometric complex of CaM-**18** up to a CaM:**18** ratio of 1. Increasing equivalents of **18** decreased the intensity of the bands, and smears appear indicating formation of complexes with varying compositions. This observation supported cross-linking interaction mode of **18** at high concentrations. Due to the weak binding nature, this interaction mode does not play roles at submicromolar concentrations.

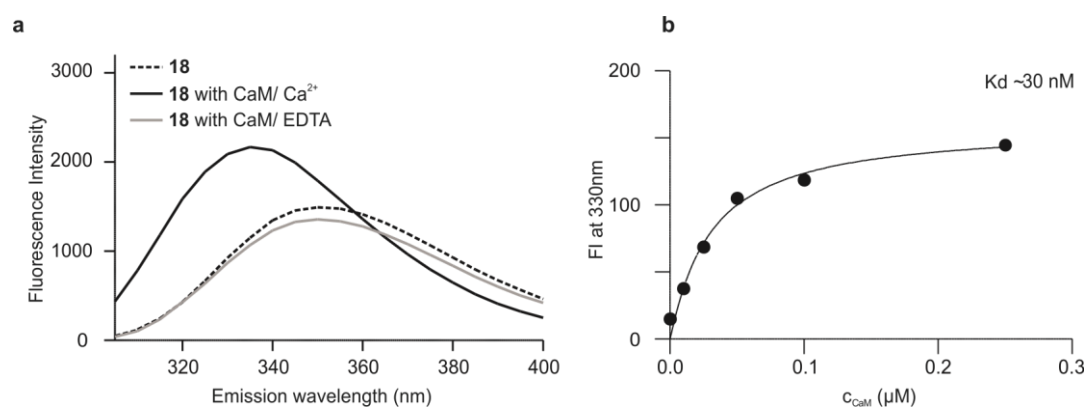

**Figure S14. Fluorescence titration experiment of 18.** **a)** observed blue shift upon the addition of CaM to **18** in the presence of  $\text{Ca}^{2+}$ . **b)** fitted titration curve and the estimated dissociation constant in the inset.

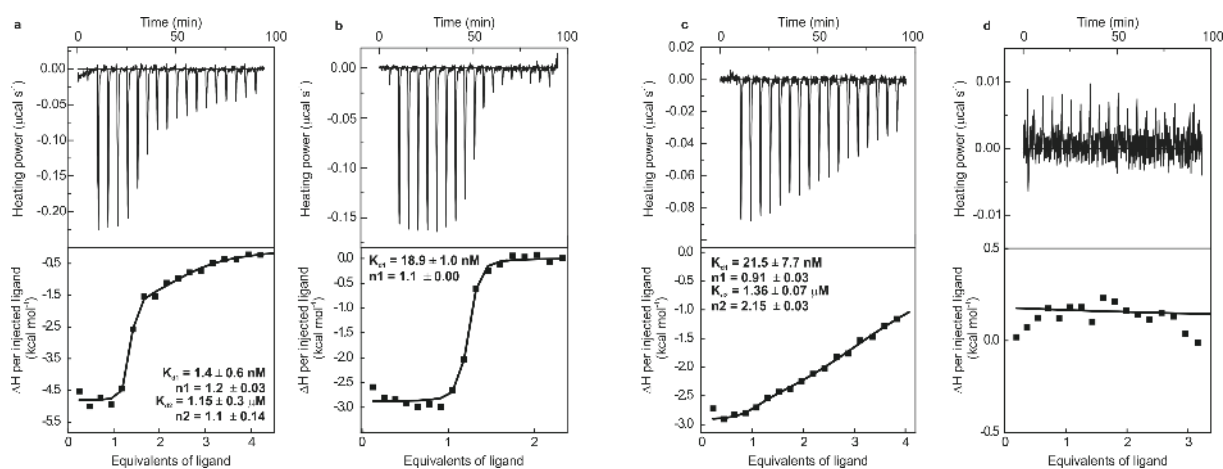

**Figure S15. ITC competitive and control titrations for **18** measured at 35 °C.** Raw data (upper) and integrated peaks with fitted values (lower) with indicated  $K_D$  and stoichiometry. **18** titrated to 3.5  $\mu\text{M}$  CaM in the cell (a), TRPV1-CT<sub>15</sub> titrated to 10  $\mu\text{M}$  CaM (b); competition experiment for **18** titrated to CaM:TRPV1-CT<sub>15</sub> 1:2 sample (c) and TRPV1-CT<sub>15</sub> titrated to CaM:**18** 1:2 sample (d). All titrations were performed in pH 7.0 20 mM HEPES, with 30 mM CaCl<sub>2</sub>.

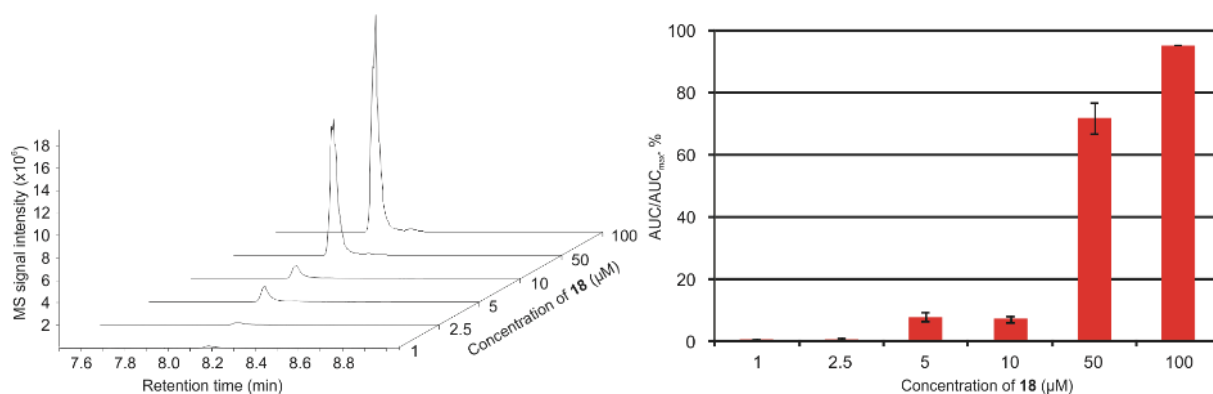

**Figure S16. Competition pull-down assay.** TRPV-CT<sub>15</sub> saturated, immobilized CaM was titrated with increasing concentrations of **18**, which exhibited a concentration-dependent elution of the TRPV1 fragment from CaM, which supported the competition between the two compounds. **a** Partial HPLC-MS spectra of the eluted TRPV-CT<sub>15</sub> (m/z: 899-901) in the presence of different competitor concentration. **b** Relative AUC values measured for TRPV1-CT<sub>15</sub>, where AUC<sub>max</sub> was given by complete elution of TRPV-CT<sub>15</sub> with EDTA. Estimated total concentration of CaM was 60 μM on the basis of the capacity of the resin, which resulted in a steep elution at 50 μM TRPV-CT<sub>15</sub> concentration and corresponded to 1:1 CaM:TRPV-CT<sub>15</sub> complex.

## Peptide characterization data

Lyophilized peptides were analyzed by ESI-MS and analytical HPLC measurements on an Aeris Widepore XB-C18 4.6 x 250 mm column (Phenomenex) with a gradient from 5% 0.1% TFA/water (A) to 80% 0.1% TFA/20% water/80% ACN (B) over 25 min at a flow rate of 1.2 ml min<sup>-1</sup>, using UV detection at 220 nm. Peptide purity was >95% according to analytical HPLC measurements.

**Table S6. Summary of ESI-MS data**

| Number | Compound | Molecular weight |              | Expected m/z values<br>(based on monoisotopic mass) |           | Detected m/z |
|--------|----------|------------------|--------------|-----------------------------------------------------|-----------|--------------|
|        |          | average          | monoisotopic |                                                     |           |              |
| 1      | WF       | 879.1408         | 878.5418     | [M+1H] <sup>1+</sup>                                | 879.5491  | 579.5834     |
|        |          |                  |              | [M+2H] <sup>2+</sup>                                | 440.2782  | 440.3333     |
| 2      | RW       | 888.1526         | 887.5745     | [M+1H] <sup>1+</sup>                                | 888.5818  | 888.5834     |
|        |          |                  |              | [M+2H] <sup>2+</sup>                                | 444.7945  | 444.9167     |
| 3      | LW       | 845.1246         | 844.5575     | [M+1H] <sup>1+</sup>                                | 845.5648  | 845.5834     |
|        |          |                  |              | [M+2H] <sup>2+</sup>                                | 423.2860  | 423.3333     |
| 4      | TW       | 833.0708         | 832.5211     | [M+1H] <sup>1+</sup>                                | 833.5284  | 833.5903     |
|        |          |                  |              | [M+2H] <sup>2+</sup>                                | 417.2678  | 417.4483     |
| 5      | control  | 879.1408         | 878.5418     | [M+1H] <sup>1+</sup>                                | 879.5491  | 879.6112     |
|        |          |                  |              | [M+2H] <sup>2+</sup>                                | 440.2782  | 440.3747     |
| 6      | WF-GGC   | 1096.3863        | 1095.5939    | [M+1H] <sup>1+</sup>                                | 1096.6012 | 1096.5000    |
|        |          |                  |              | [M+2H] <sup>2+</sup>                                | 548.8042  | 548.8333     |
| 7      | WW-GGC   | 1135.4224        | 1134.6048    | [M+1H] <sup>1+</sup>                                | 1135.6121 | 1135.5834    |
|        |          |                  |              | [M+2H] <sup>2+</sup>                                | 568.3097  | 568.3333     |
| 8      | YF-GGC   | 1073.3497        | 1072.5780    | [M+1H] <sup>1+</sup>                                | 1073.5853 | 1073.5834    |
|        |          |                  |              | [M+2H] <sup>2+</sup>                                | 537.2963  | 537.4167     |
| 9      | RW-GGC   | 1105.3982        | 1104.6266    | [M+1H] <sup>1+</sup>                                | 1105.6339 | 1105.5834    |
|        |          |                  |              | [M+2H] <sup>2+</sup>                                | 553.3206  | 553.4157     |
| 10     | KW-GGC   | 1077.3848        | 1076.6205    | [M+1H] <sup>1+</sup>                                | 1077.6278 | 1077.5834    |
|        |          |                  |              | [M+2H] <sup>2+</sup>                                | 539.3175  | 539.5000     |
| 11     | RF-GGC   | 1066.3621        | 1065.6157    | [M+1H] <sup>1+</sup>                                | 1066.6230 | 1066.5834    |
|        |          |                  |              | [M+2H] <sup>2+</sup>                                | 533.8151  | 533.9167     |
| 12     | LW-GGC   | 1062.3701        | 1061.6096    | [M+1H] <sup>1+</sup>                                | 1062.6169 | 1062.6667    |
|        |          |                  |              | [M+2H] <sup>2+</sup>                                | 531.8121  | 531.9167     |
| 13     | VW-GGC   | 1048.3435        | 1047.5939    | [M+1H] <sup>1+</sup>                                | 1048.6012 | 1048.6168    |
|        |          |                  |              | [M+2H] <sup>2+</sup>                                | 524.8042  | 525.0317     |
| 14     | IF-GGC   | 1023.3341        | 1022.5987    | [M+1H] <sup>1+</sup>                                | 1023.6060 | 1023.6667    |
|        |          |                  |              | [M+2H] <sup>2+</sup>                                | 512.3066  | 512.5000     |
| 15     | SW-GGC   | 1036.2898        | 1035.5576    | [M+1H] <sup>1+</sup>                                | 1036.5649 | 1036.5834    |
|        |          |                  |              | [M+2H] <sup>2+</sup>                                | 518.7861  | 518.8333     |
| 16     | QW-GGC   | 1077.3417        | 1076.5841    | [M+1H] <sup>1+</sup>                                | 1077.5914 | 1077.5000    |
|        |          |                  |              | [M+2H] <sup>2+</sup>                                | 539.2993  | 539.3333     |
| 17     | TW-GGC   | 1050.3164        | 1049.5732    | [M+1H] <sup>1+</sup>                                | 1050.5805 | 1050.5834    |
|        |          |                  |              | [M+2H] <sup>2+</sup>                                | 525.7939  | 525.9167     |
| 9-12   | RW-LW    | 2118.7158        | 2117.2740    | [M+2H] <sup>2+</sup>                                | 1059.6423 | 1059.6600    |
|        |          |                  |              | [M+3H] <sup>3+</sup>                                | 706.7639  | 706.8000     |

|                          |  |           |           |                            |          |          |
|--------------------------|--|-----------|-----------|----------------------------|----------|----------|
| TRPV1 <sub>784-798</sub> |  | 1798.0990 | 1797.0162 | <b>[M+2H]<sup>2+</sup></b> | 899.5081 | 899.9639 |
|                          |  |           |           | <b>[M+3H]<sup>3+</sup></b> | 600.0054 | 600.6056 |





## Compound 2

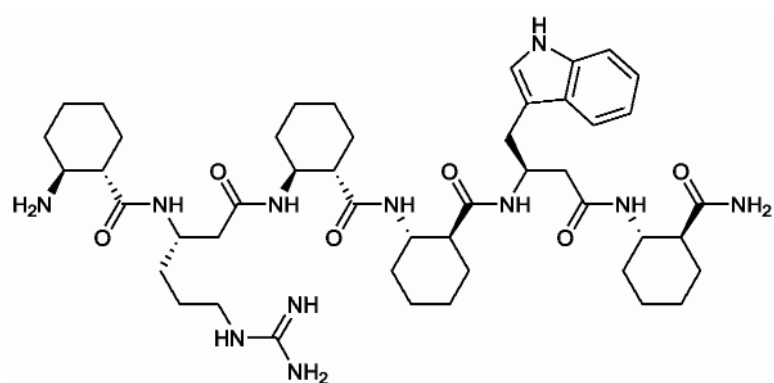

RWms #21-26 RT: 0.07-0.09 AV: 6 NL: 4.71E6  
T: ITMS + p ESIFull ms [200.00-2000.00]

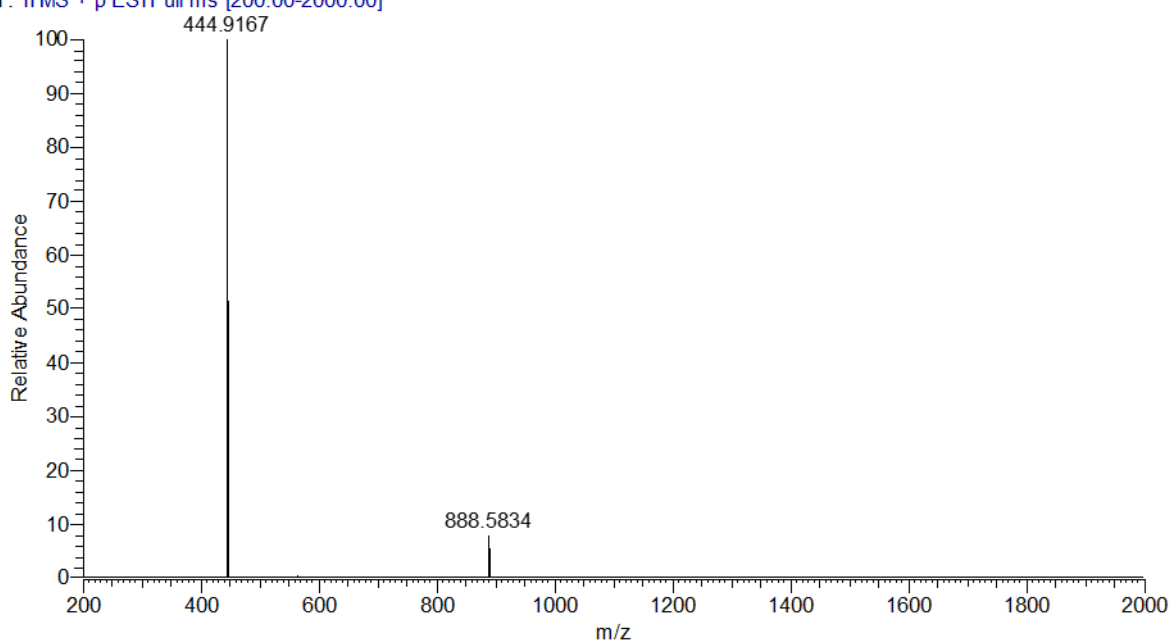

RT: 0.00 - 25.00

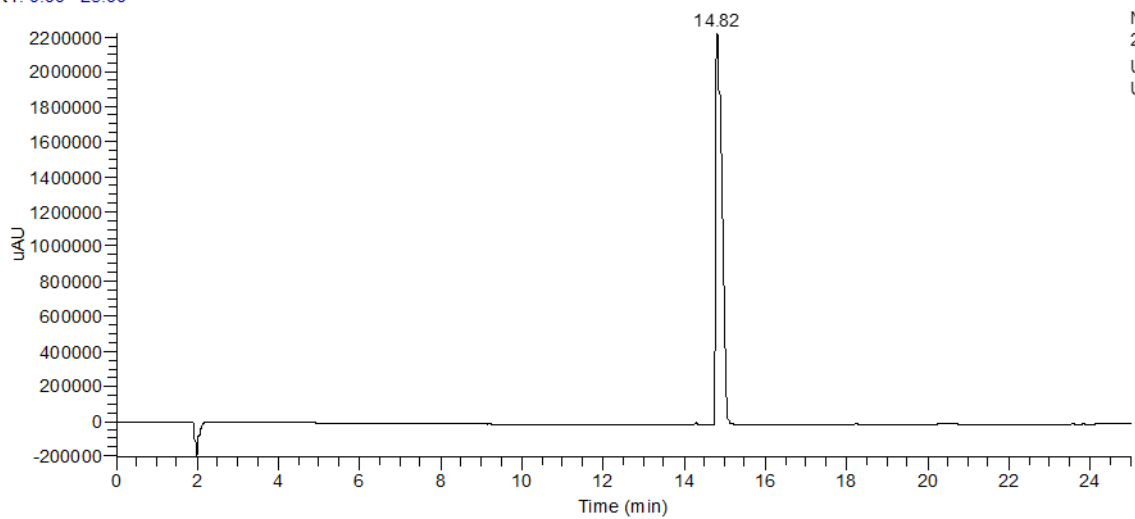

NL:  
2.22E6  
UV\_MS\_2  
UV2 RW

### Compound 3

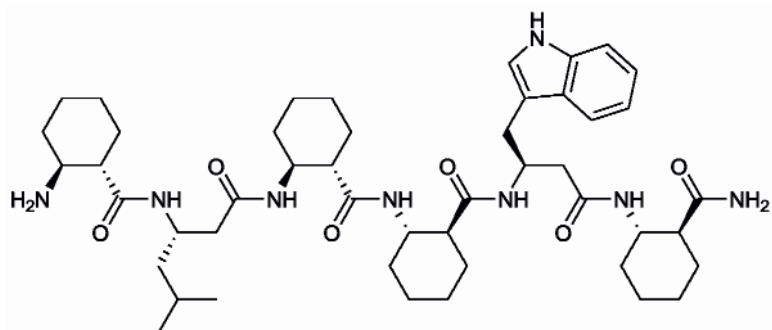

LWms #20-26 RT: 0.07-0.09 AV: 7 NL: 1.68E6  
T: ITMS + p ESIFull ms [200.00-2000.00]

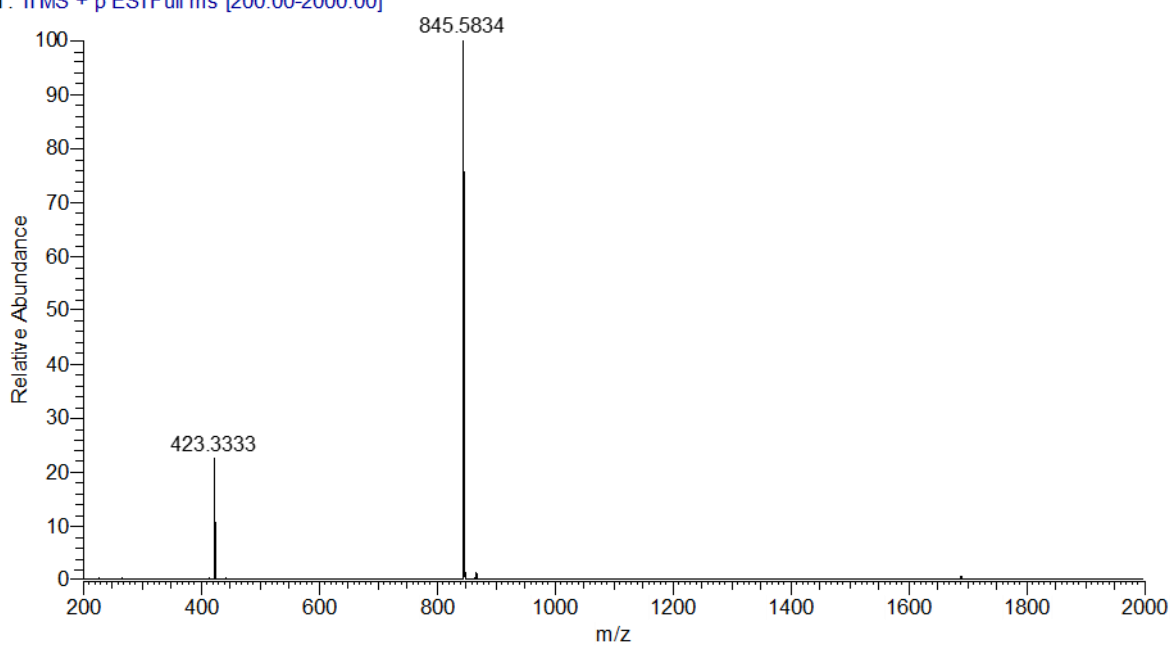

RT: 0.00 - 25.00

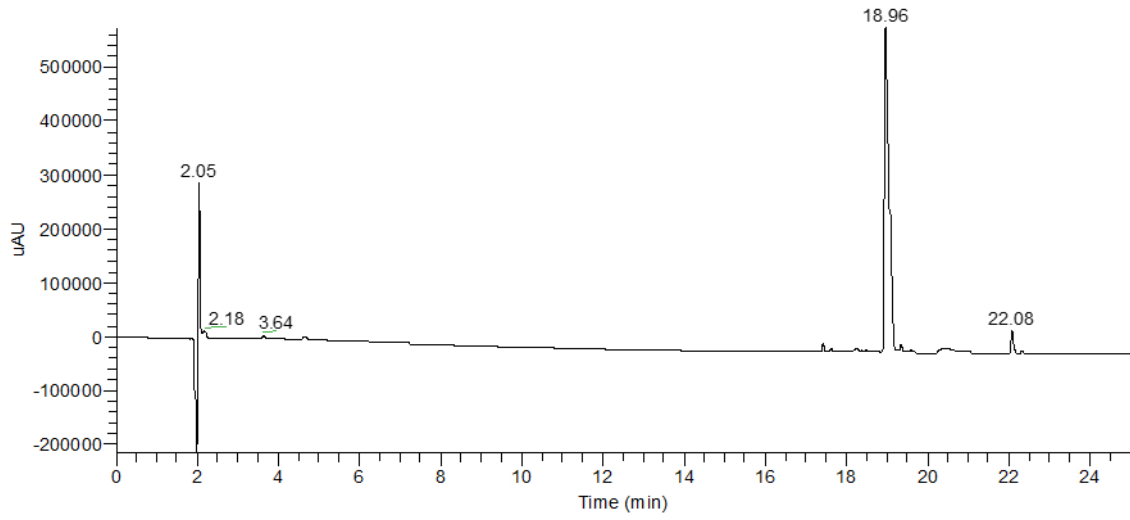

NL:  
5.72E5  
UV\_MS\_2  
UV2 LW



# Compound 5

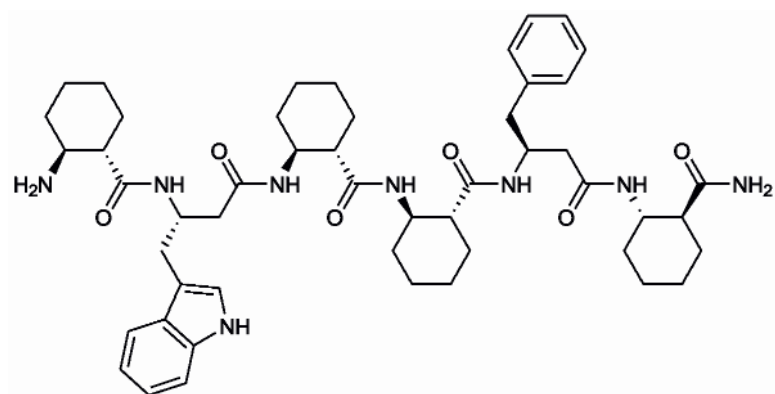

rrwfp10115f2 #22-29 RT: 0.07-0.09 AV: 8 NL: 1.56E6  
T: ITMS + c ESIFull ms [200.00-2000.00]

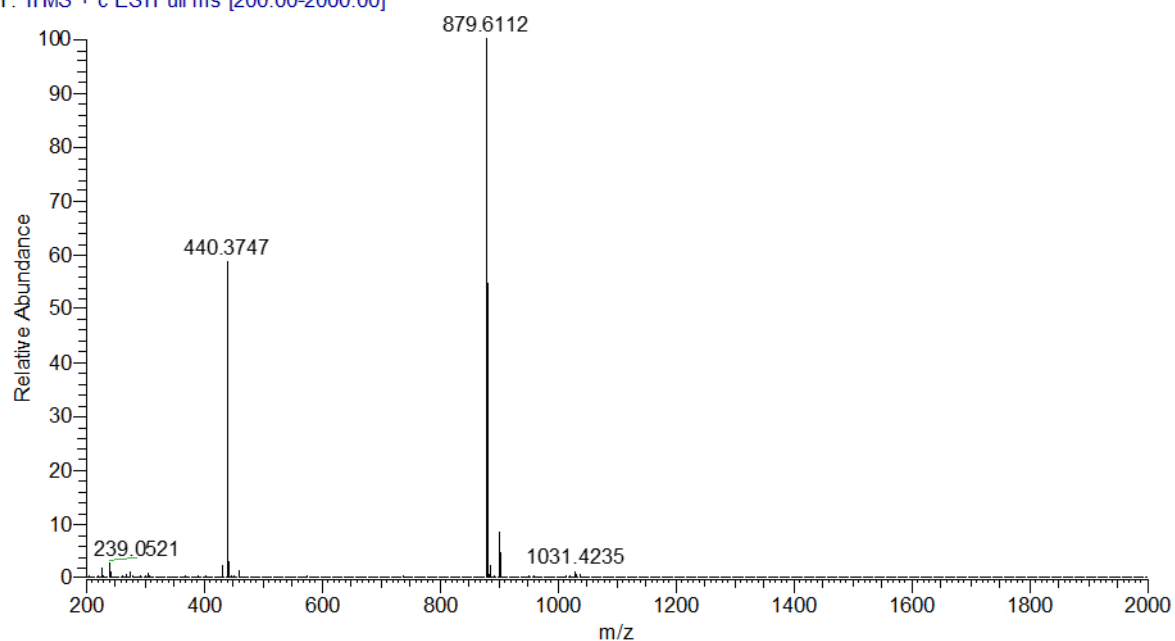

RT: 0.00 - 25.00

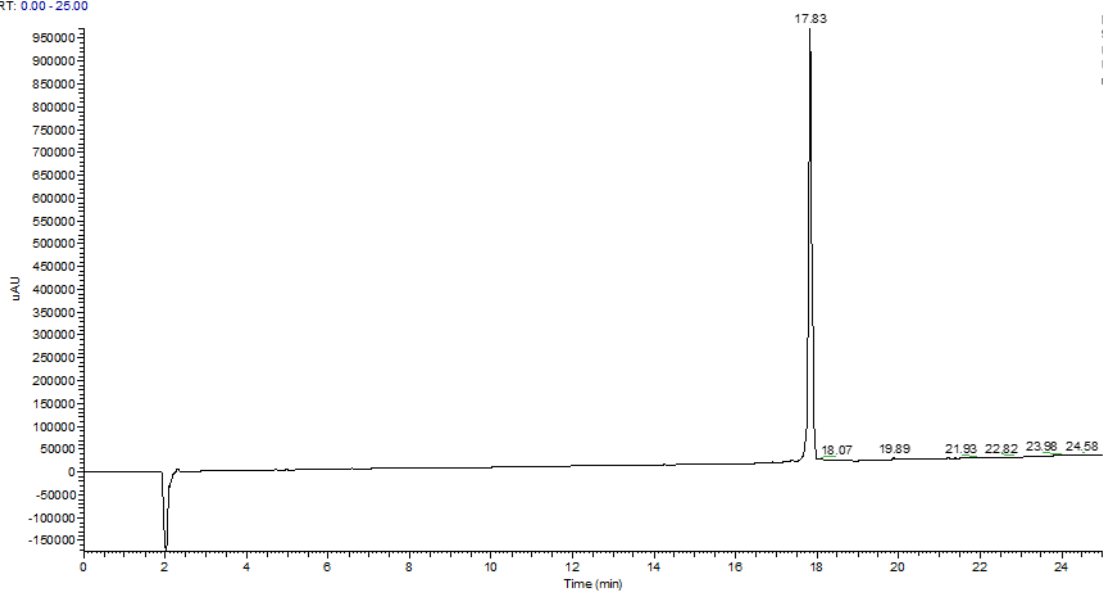

NL:  
8.73E5  
UV\_V6\_2  
UV 2  
rrWFiUV6

# Compound 6

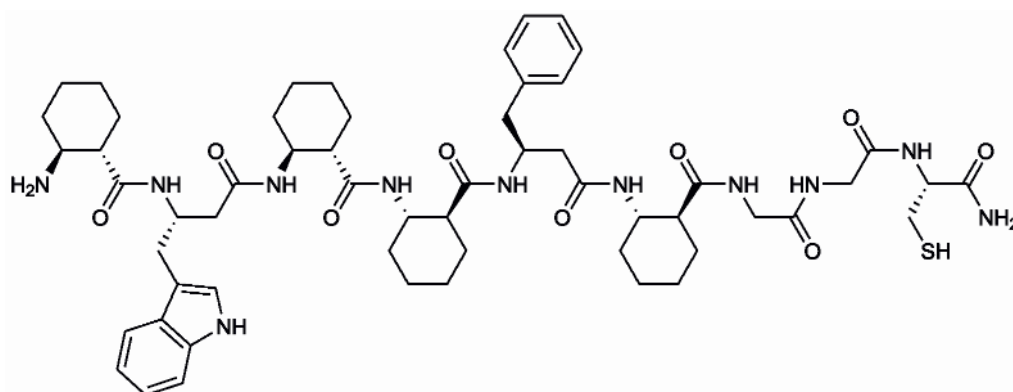

WFGGCms #19-27 RT: 0.07-0.09 AV: 9 NL: 7.73E5  
T: ITMS + p ESI Full ms [200.00-2000.00]

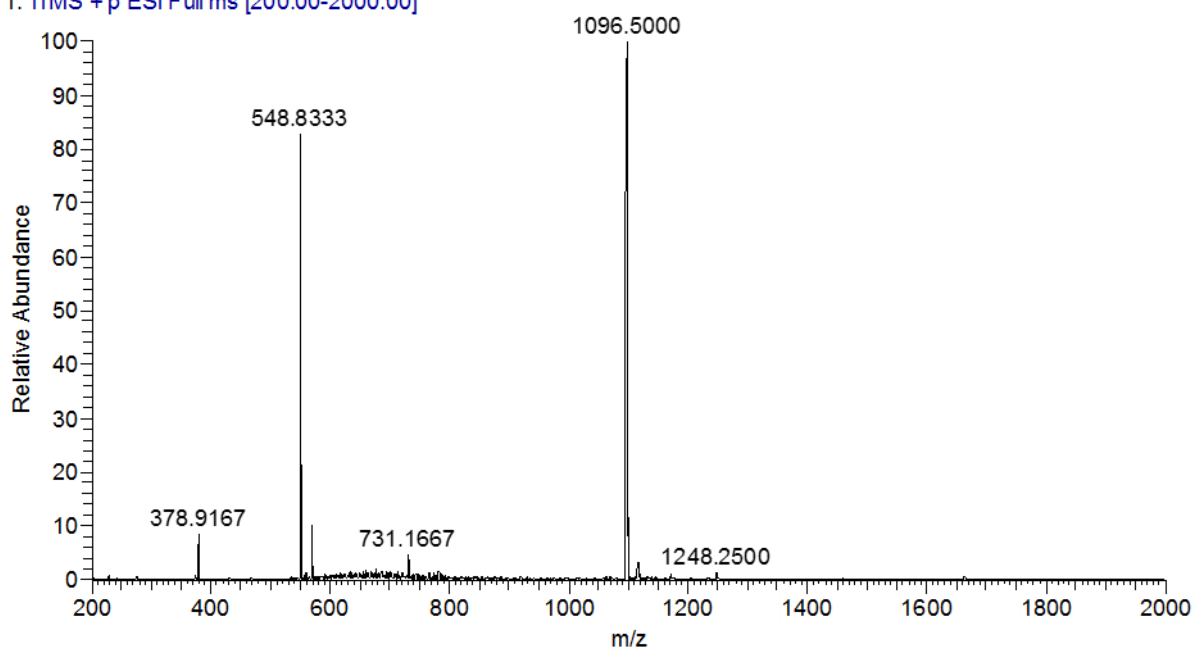

RT: 0.00 - 25.00

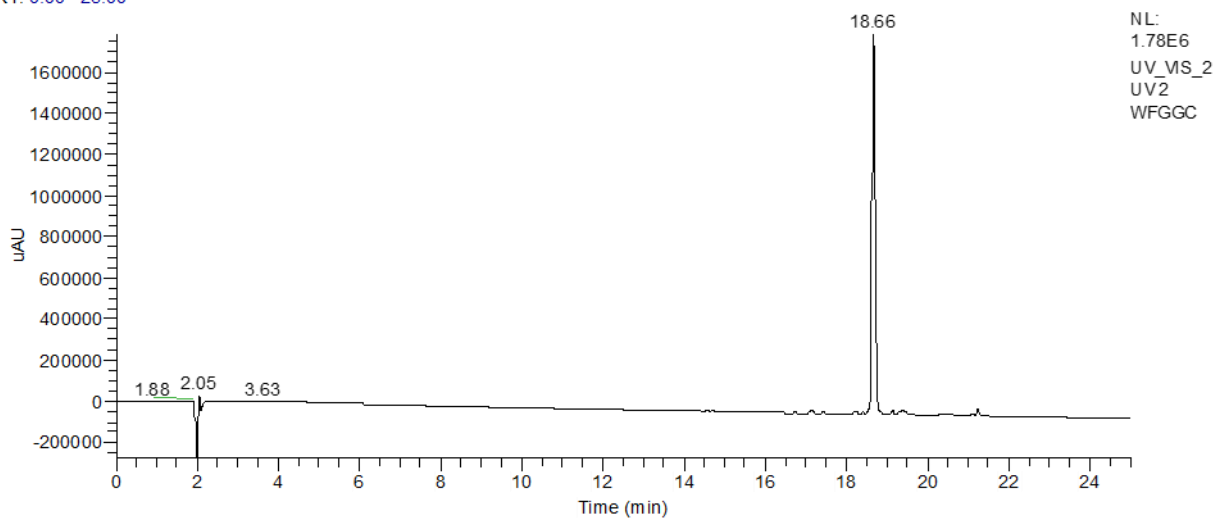

# Compound 7

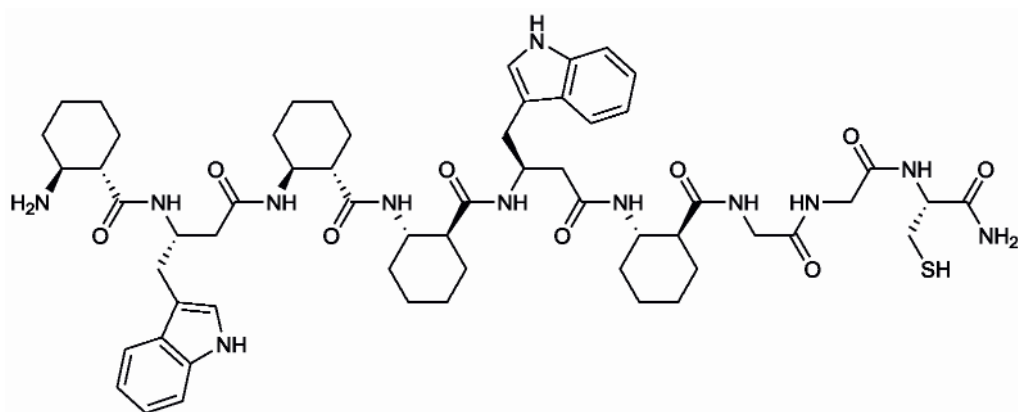

WWGGCmsre\_160106100645 #20-26 RT: 0.07-0.09 AV: 7 NL: 4.92E5  
T: ITMS + p ESI Full ms [200.00-2000.00]

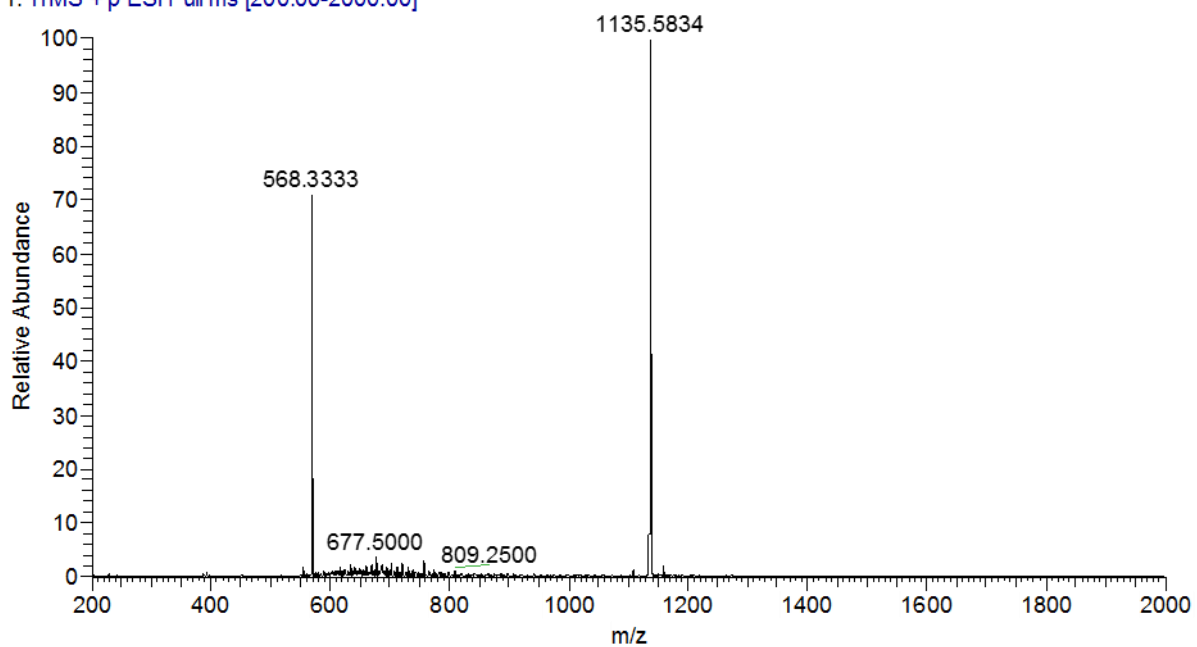

RT: 0.00 - 25.00

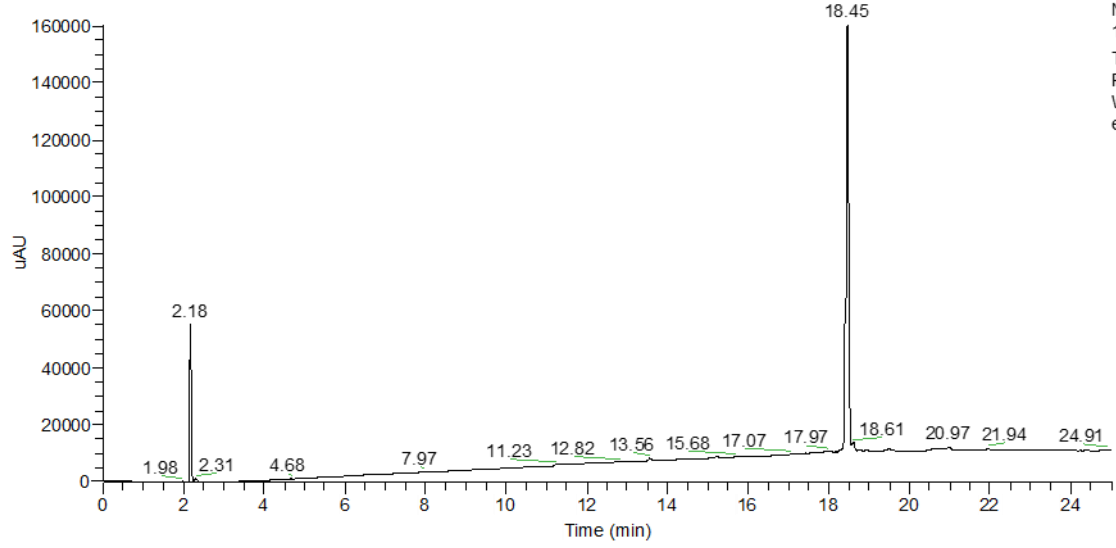

NL:  
1.60E5  
Total Scan  
PDA  
WWggcUVr  
e







# Compound 9

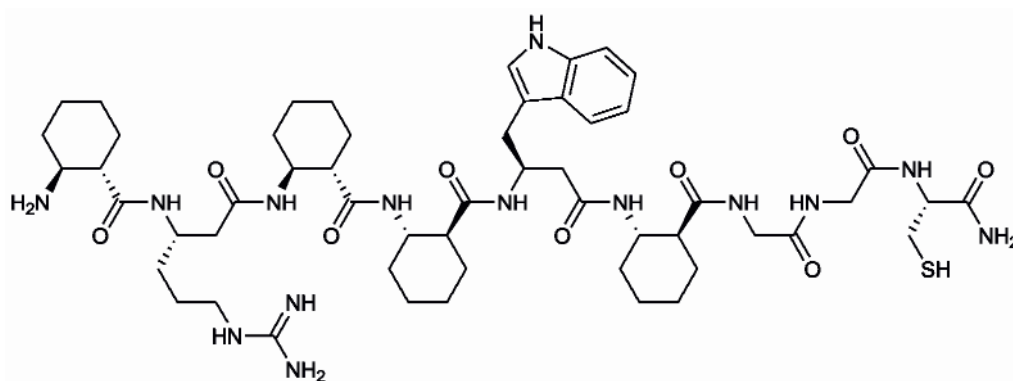

RWGGCmsre\_160106085001 #19-24 RT: 0.07-0.08 AV: 6 NL: 1.62E6  
T: ITMS + p ESI Full ms [200.00-2000.00]

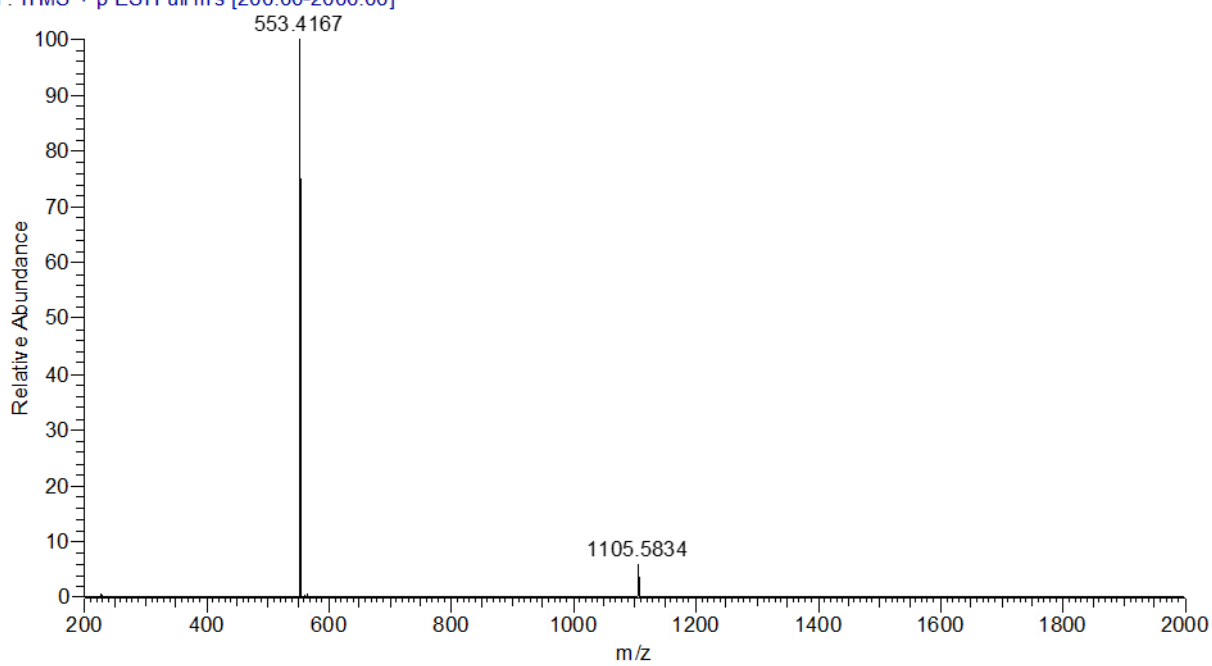

RT: 0.00 - 25.00

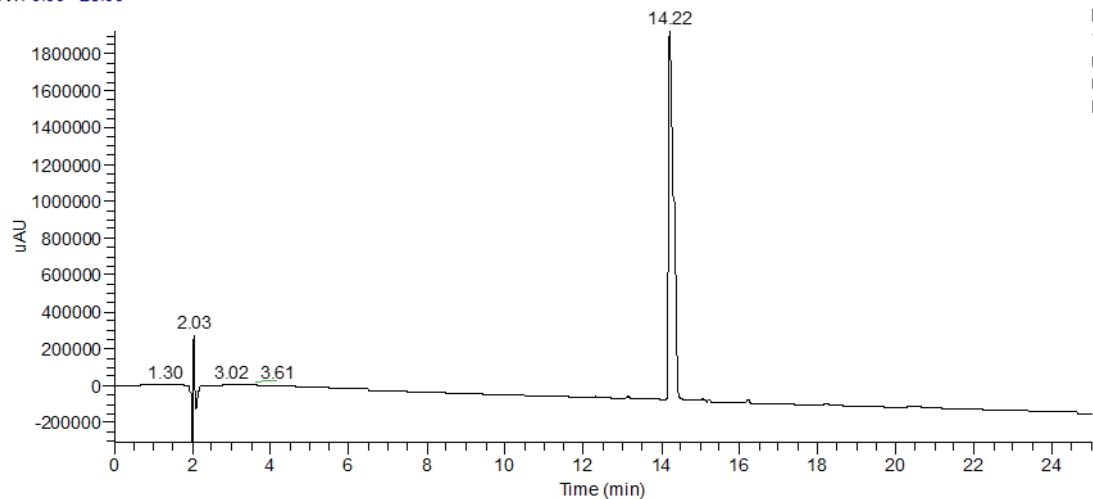

NL:  
1.92E6  
UV\_VIS\_2  
UV2  
RWGGC

# Compound 10

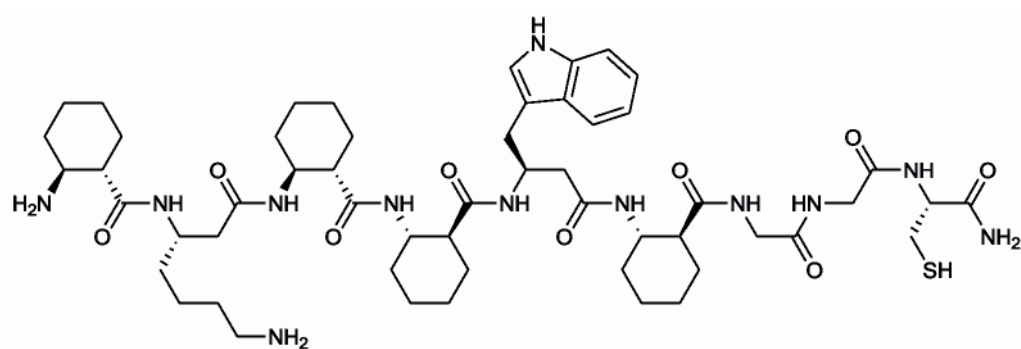

KWGGCms\_160106085135 #19-27 RT: 0.07-0.09 AV: 9 NL: 4.95E6  
T: ITMS + p ESI Full ms [200.00-2000.00]

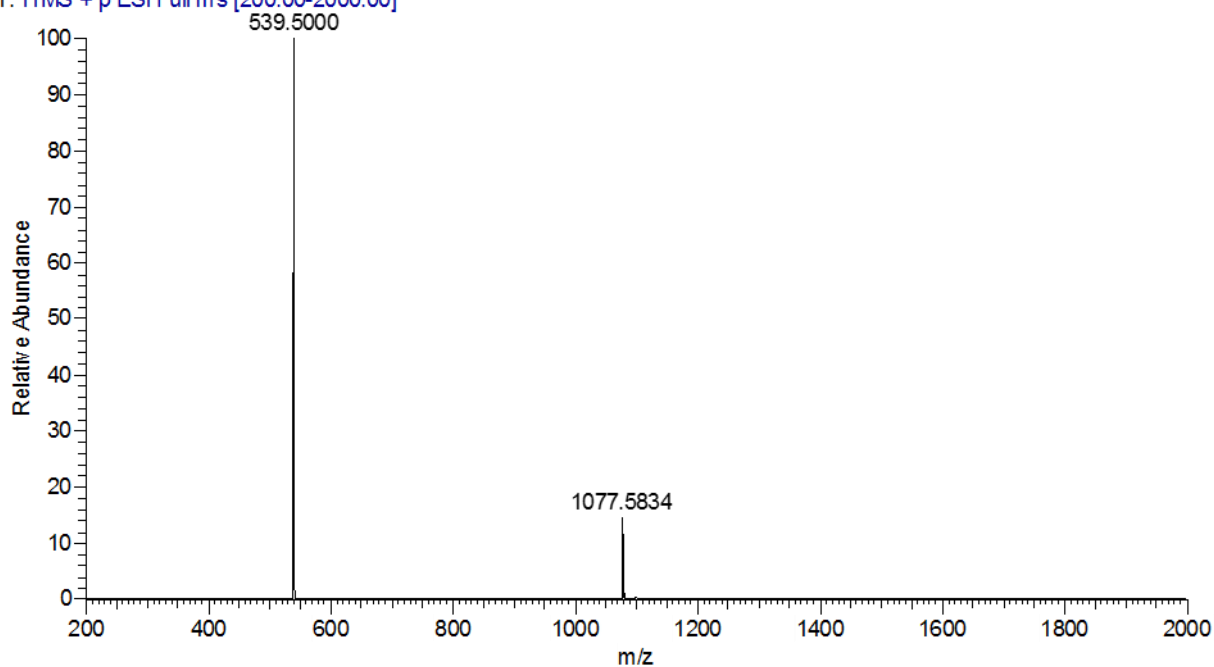

RT: 0.00 - 25.00

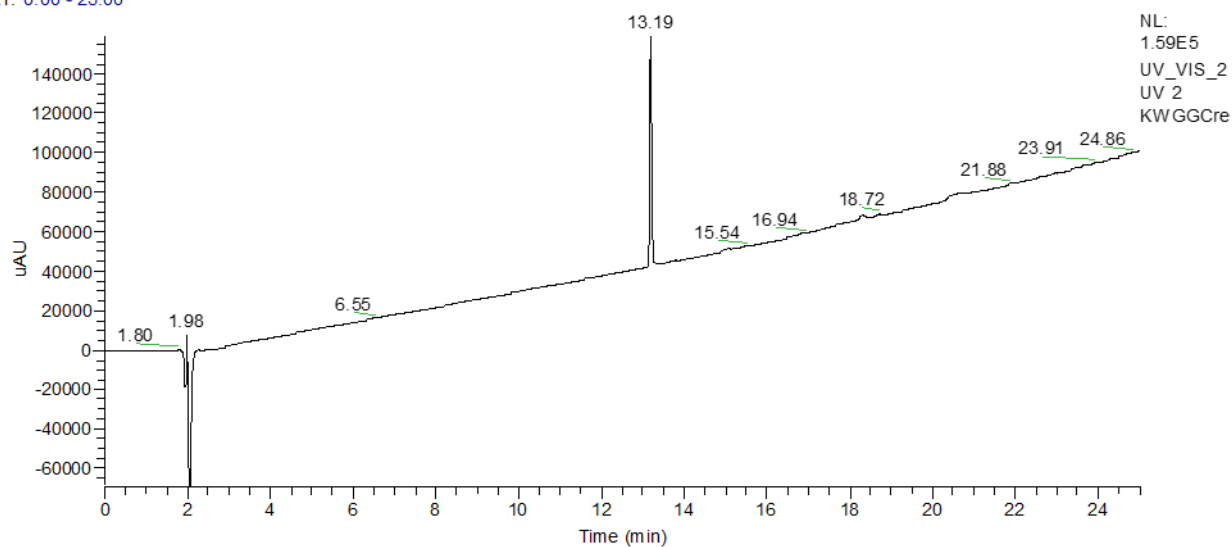



# Compound 11

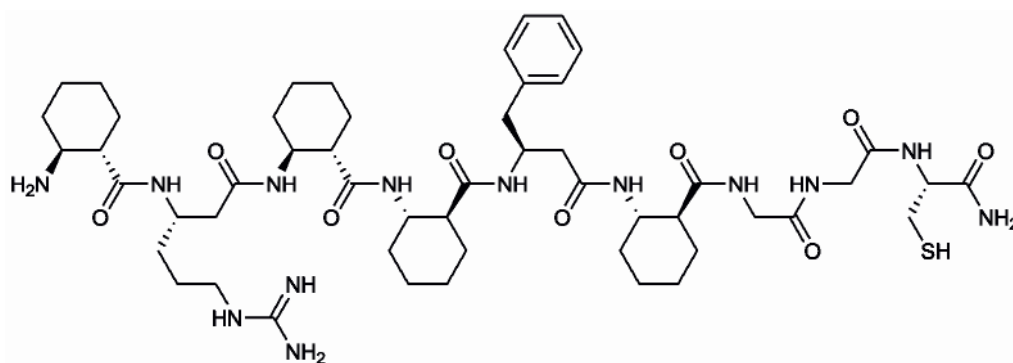

RFGGCms #20-31 RT: 0.07-0.11 AV: 12 NL: 6.58E6  
T: ITMS + p ESI Full ms [200.00-2000.00]

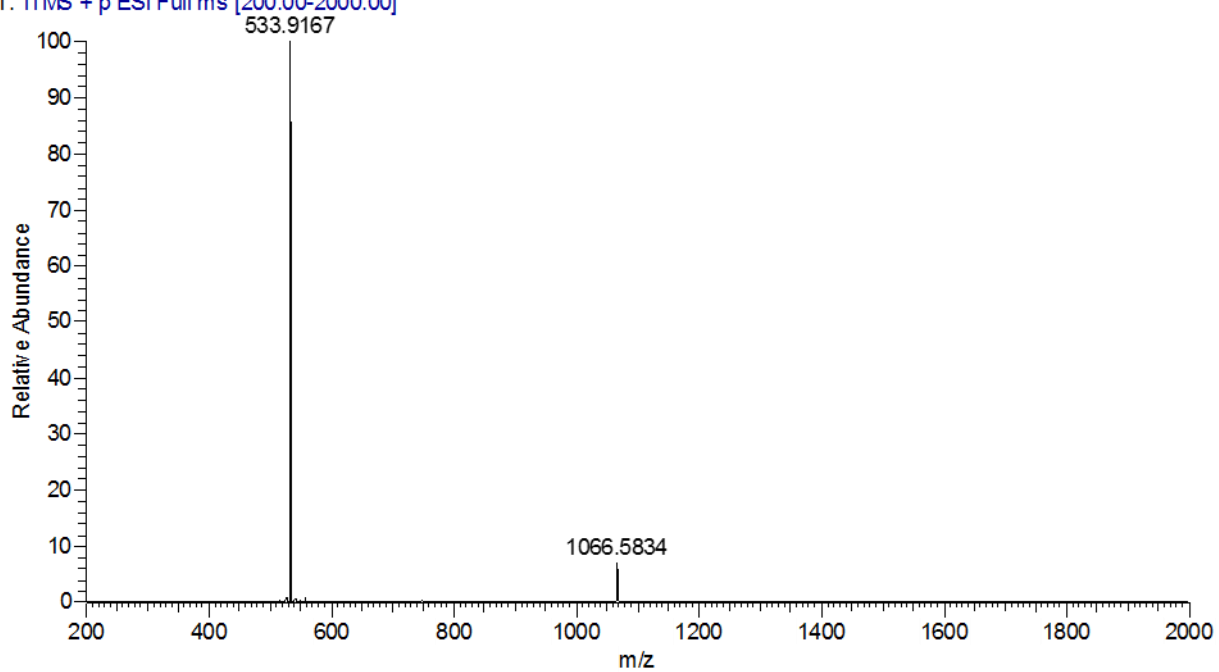

RT: 0.00 - 25.00

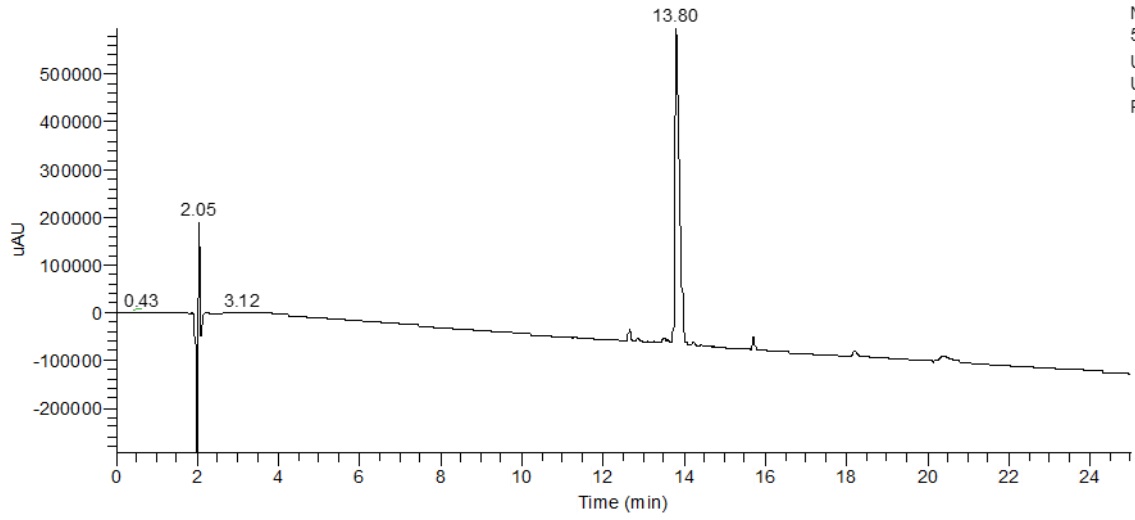

NL:  
5.96E5  
UV\_MS\_2  
UV2  
RFGGC





# Compound 13

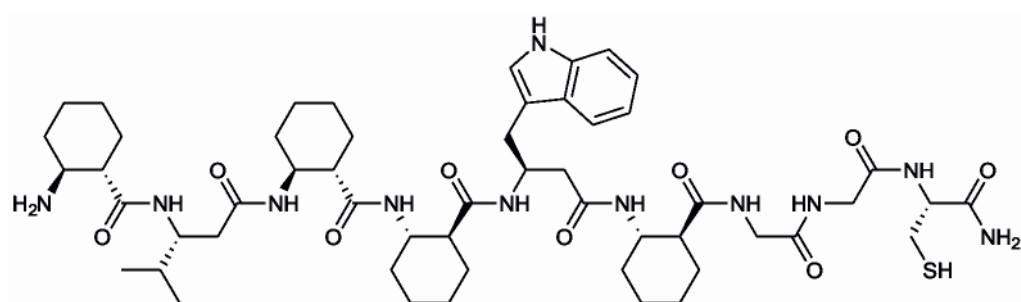

VWGGCp1113msf4 #20-30 RT: 0.06-0.09 AV: 11 NL: 9.53E5  
 T: ITMS + c ESI Full ms [200.00-2000.00]

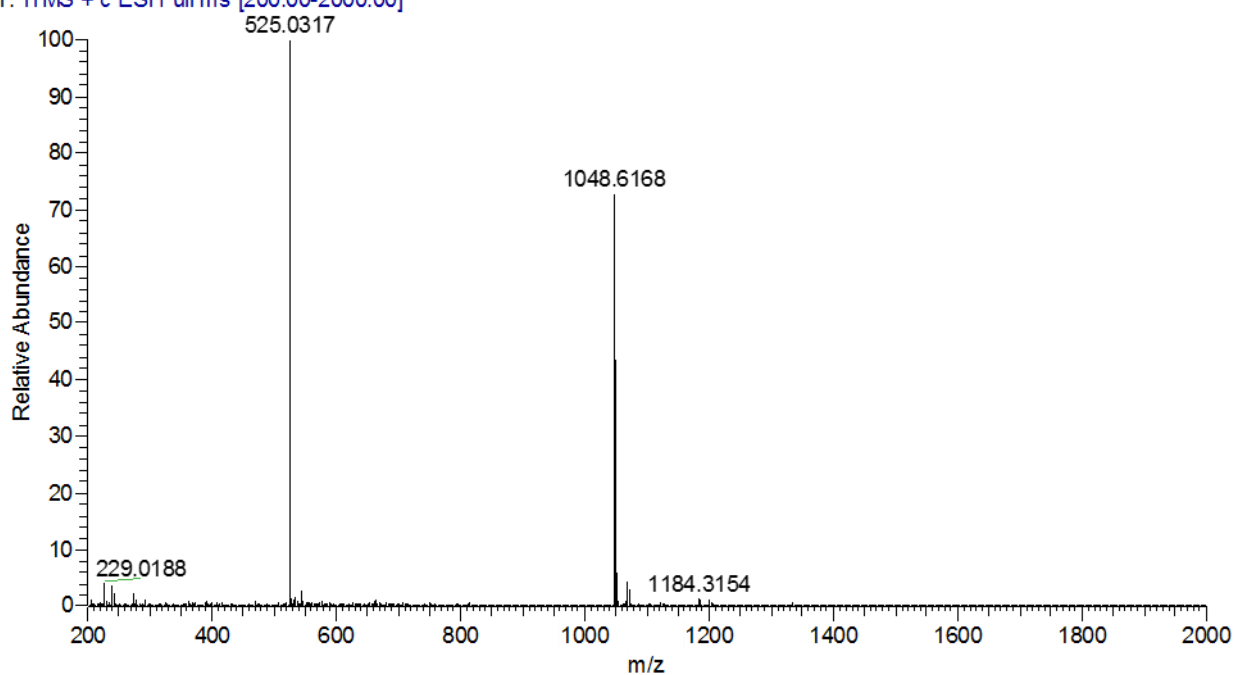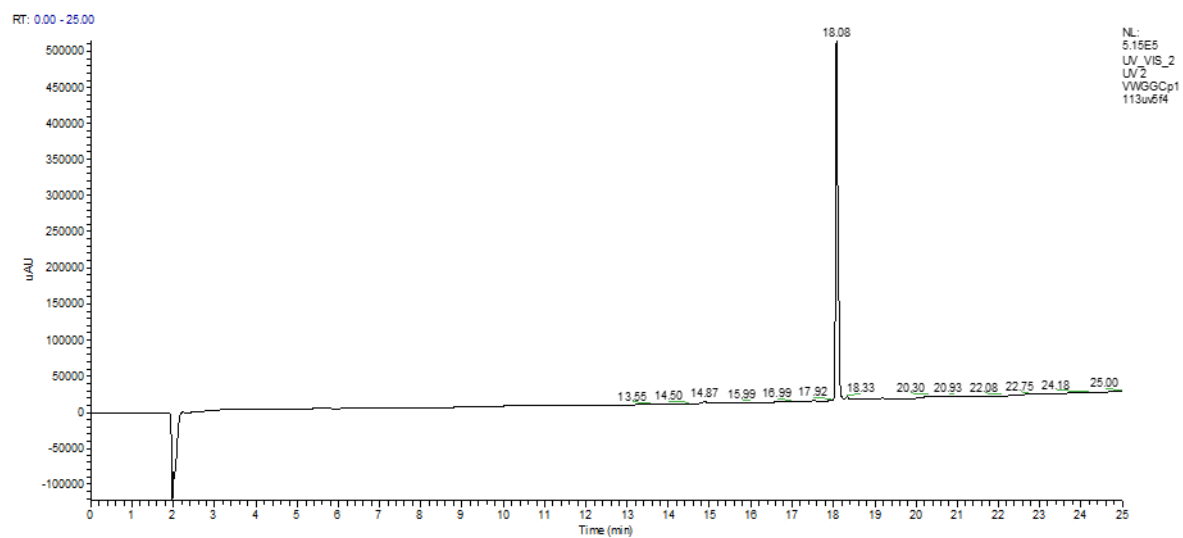

# Compound 14

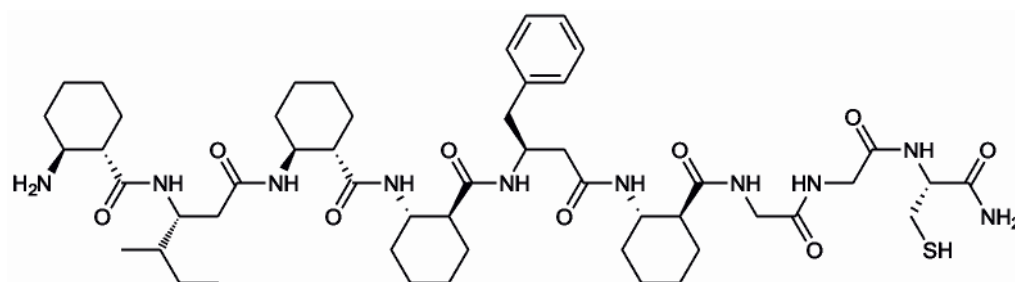

IFGGCms #20-25 RT: 0.07-0.09 AV: 6 NL: 8.66E5  
T: ITMS + p ESIFull ms [200.00-2000.00]

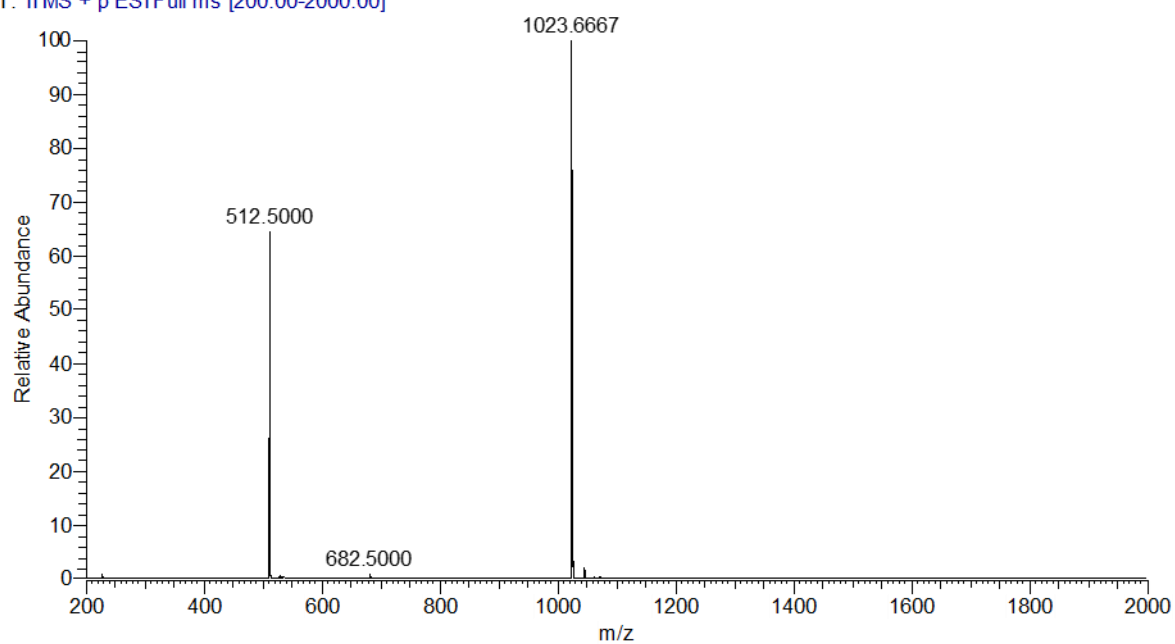

RT: 0.00 - 25.00

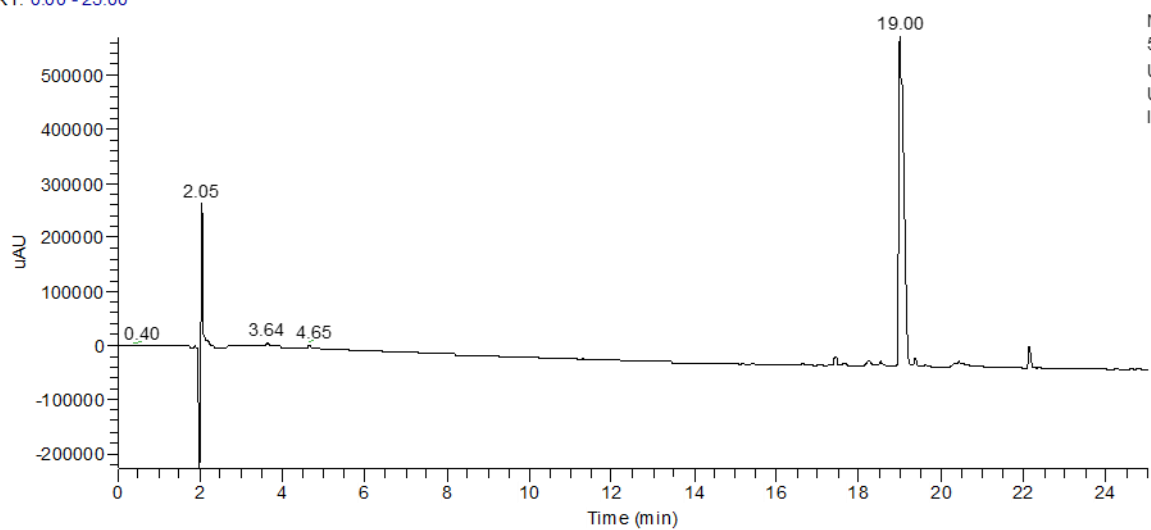

NL:  
5.70E5  
UV\_VIS\_2  
UV2  
IFGGC



# Compound 16

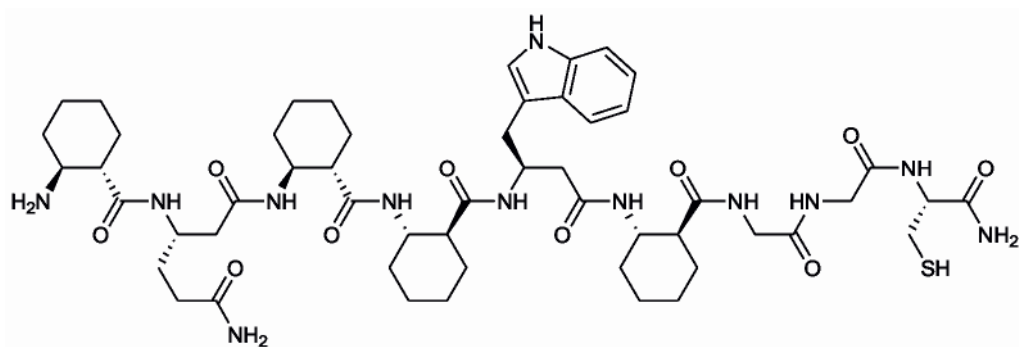

QWGGCms #20-26 RT: 0.07-0.09 AV: 7 NL: 7.16E5  
T: ITMS + p ESIFull ms [200.00-2000.00]

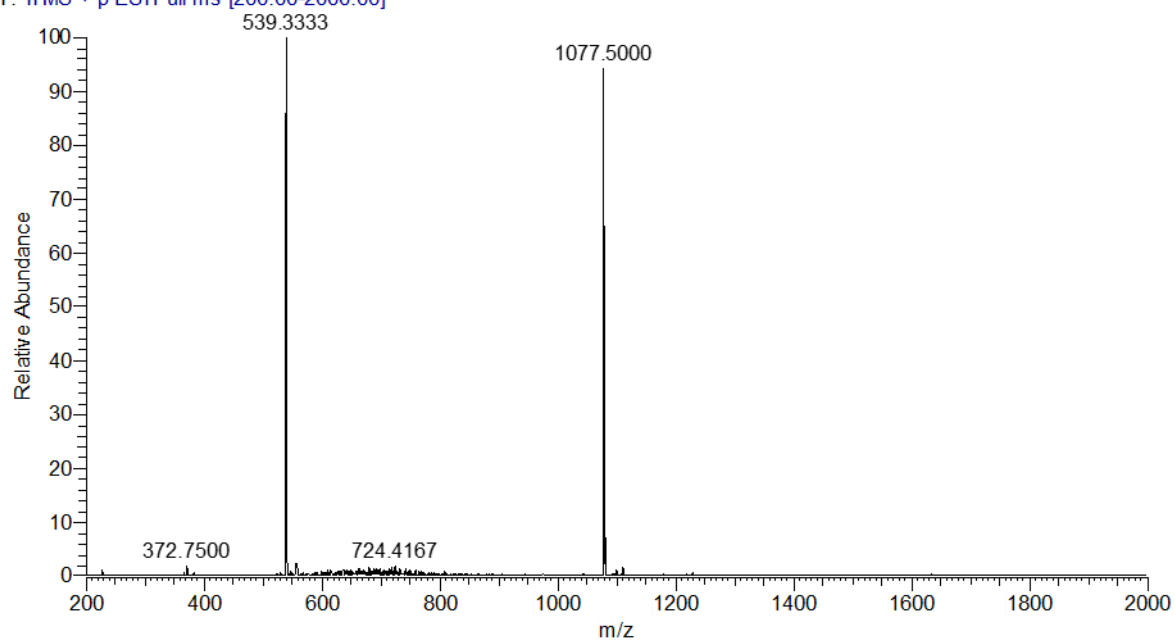

RT: 0.00 - 25.00

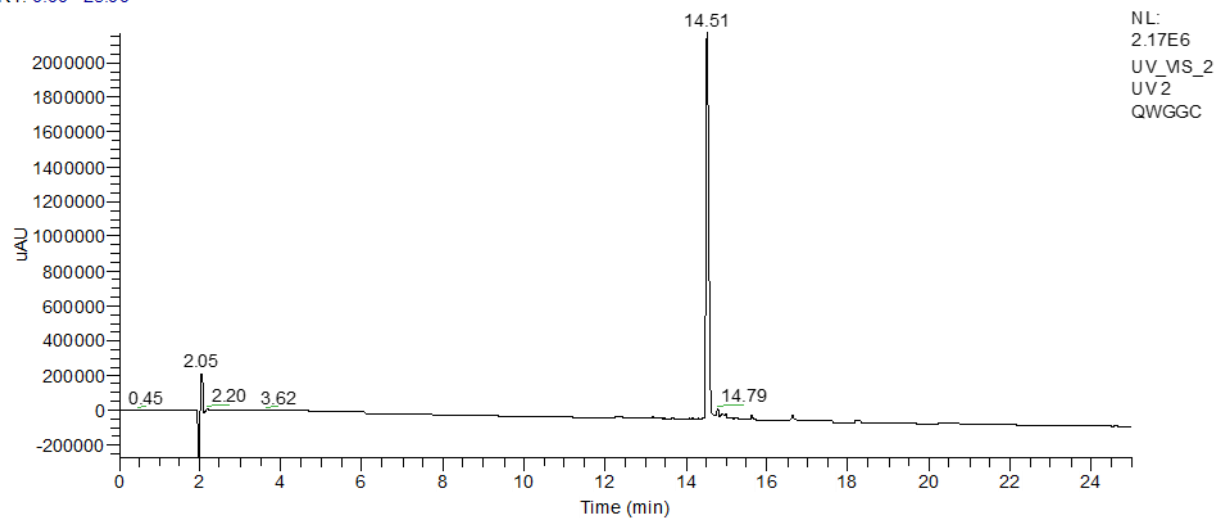

NL:  
2.17E6  
UV\_VIS\_2  
UV2  
QWGGC









|| 115\_f13 #49-57 RT: 0.15-0.17 AV: 9 NL: 2.37E7  
T: ITMS + c ESI Full ms [200.00-2000.00]

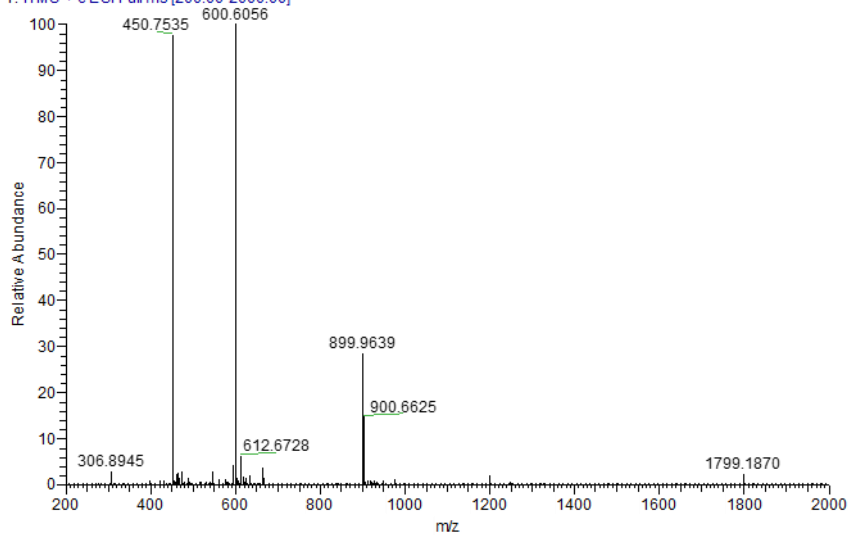

## References

- 1 Boutin, J. A. *et al.* Limitations of the coupling of amino acid mixtures for the preparation of equimolar peptide libraries. *Mol. Divers.* **3**, 43-60 (1997).
- 2 Gsponer, J. *et al.* A coupled equilibrium shift mechanism in calmodulin-mediated signal transduction. *Structure* **16**, 736-746 (2008).
